# Supplementary material for: Mono- and diiodo-1,2,3-triazoles and their mono nitro derivatives
Source: Royal Society of Chemistry journal article supplement (doi:10.1039/c6dt01731b), 2016-01-01

## Electronic Supplementary Information

### Mono- and Diiodo-1,2,3-Triazoles and Their Mono Nitro Derivatives

Deepak Chand, Chunlin He, James P. Hooper, Lauren A. Mitchell, Damon A. Parrish, and Jean'ne M. Shreeve\*

#### Table of Contents:

| Content                               | Page |
|---------------------------------------|------|
| Isodesmic reactions                   | S2   |
| Table S1 – Crystallographic Data      | S3   |
| Spectral data of <b>2</b> – <b>11</b> | S5   |

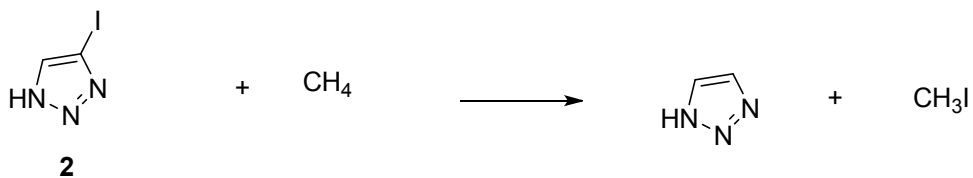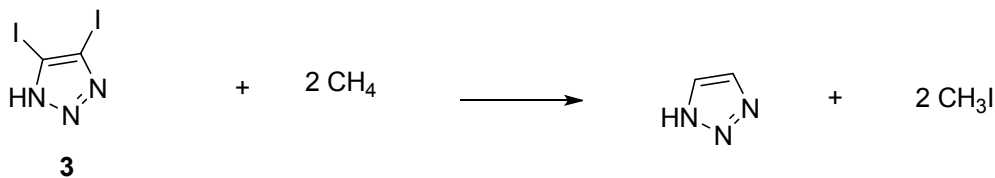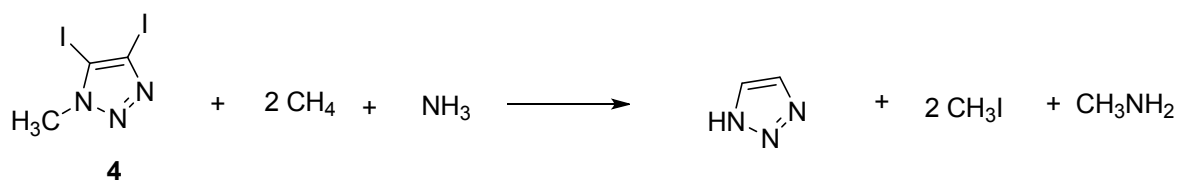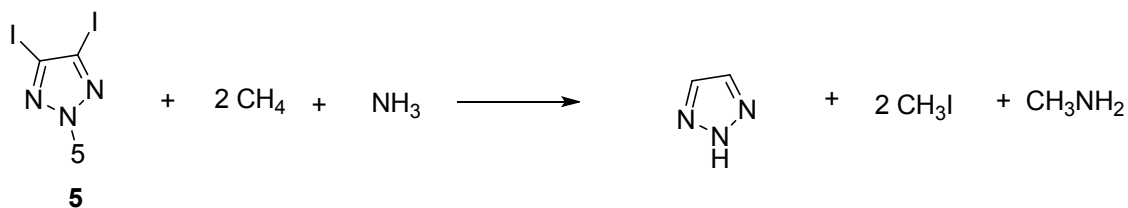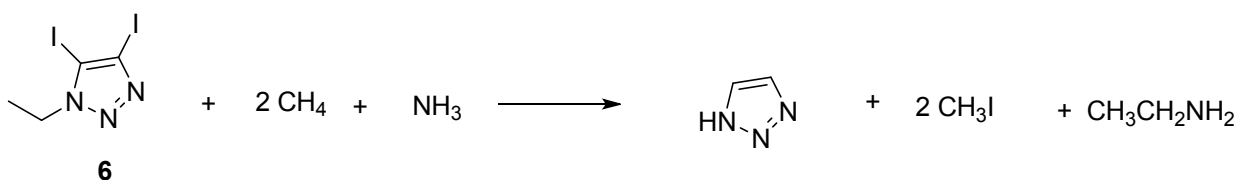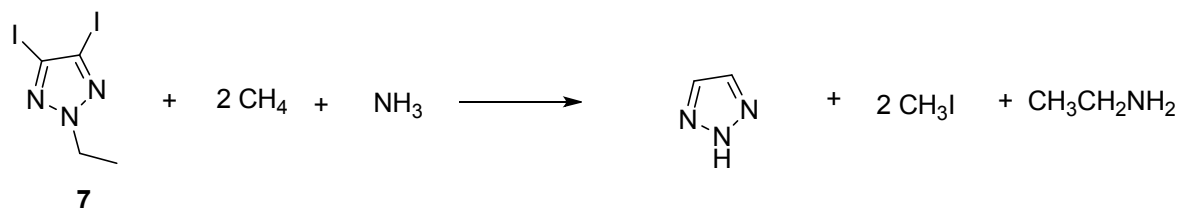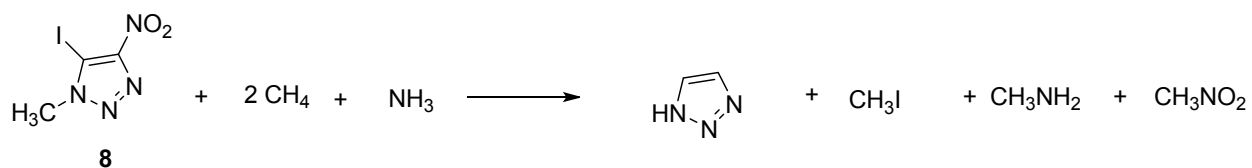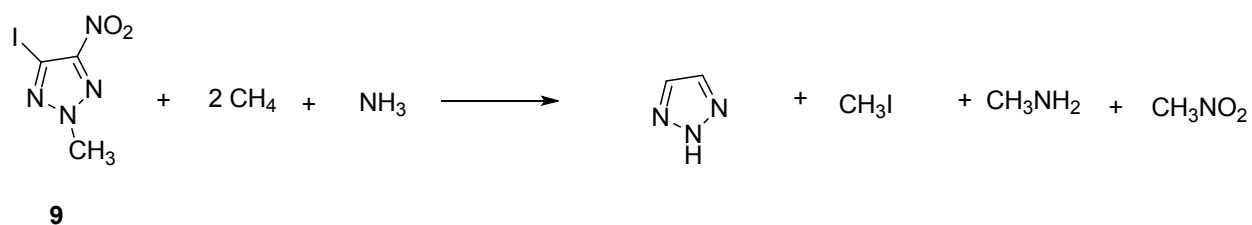

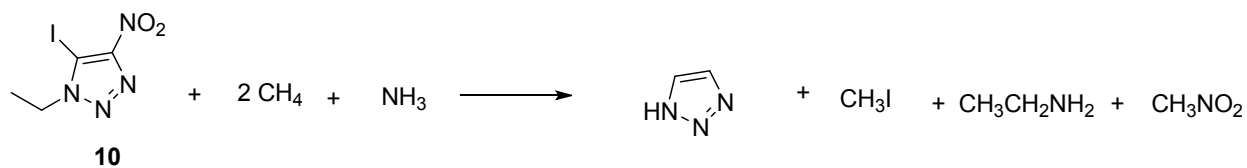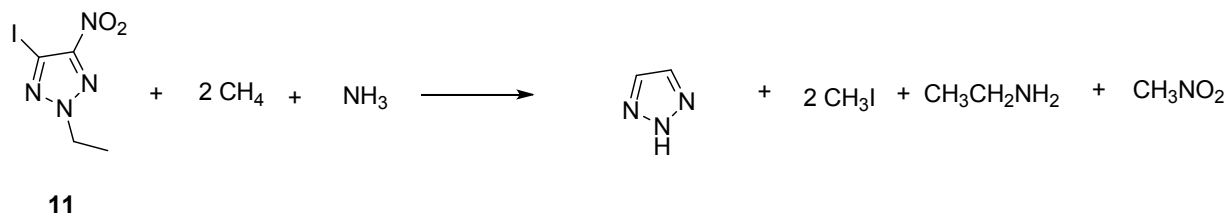

Scheme S1: Isodesmic reactions

Table S1: Crystallographic data for compounds 5, 6, 8 and 10.

| Compound                        | <b>5</b>                                                    | <b>6</b>                                                    | <b>8</b>                                                     | <b>10</b>                                                    |
|---------------------------------|-------------------------------------------------------------|-------------------------------------------------------------|--------------------------------------------------------------|--------------------------------------------------------------|
| Formula                         | C <sub>3</sub> H <sub>3</sub> I <sub>2</sub> N <sub>3</sub> | C <sub>4</sub> H <sub>5</sub> I <sub>2</sub> N <sub>3</sub> | C <sub>3</sub> H <sub>3</sub> IN <sub>4</sub> O <sub>2</sub> | C <sub>4</sub> H <sub>5</sub> IN <sub>4</sub> O <sub>2</sub> |
| CCDC number                     | 1446302                                                     | 1446304                                                     | 1446331                                                      | 1446333                                                      |
| <i>M<sub>w</sub></i>            | 334.88                                                      | 348.91                                                      | 253.99                                                       | 268.02                                                       |
| Crystal size [mm <sup>3</sup> ] | 0.399 x 0.206 x<br>0.018                                    | 0.316 x 0.115 x<br>0.104                                    | 0.223 x 0.150 x<br>0.037                                     | 0.174 x 0.077 x<br>0.014                                     |
| Crystal system                  | Orthorhombic                                                | Triclinic                                                   | Triclinic                                                    | Triclinic                                                    |
| Space group                     | Pmn2 <sub>1</sub>                                           | P-1                                                         | P-1                                                          | P-1                                                          |
| <i>a</i> [Å]                    | 11.4559(8)                                                  | 7.274(3)                                                    | 7.0649(12)                                                   | 6.9327(11)                                                   |
| <i>b</i> [Å]                    | 4.1982(3)                                                   | 7.508(3)                                                    | 7.2001(12)                                                   | 7.2485(11)                                                   |
| <i>c</i> [Å]                    | 7.7048(5)                                                   | 7.980(3)                                                    | 70.362(5)                                                    | 8.5638(12)                                                   |
| <i>α</i> [°]                    | 90                                                          | 84.239(4)                                                   | 64.462(5)                                                    | 77.511(5)                                                    |
| <i>β</i> [°]                    | 90                                                          | 83.370(5)                                                   | 64.462(5)                                                    | 67.263(4)°                                                   |
| <i>γ</i> [°]                    | 90                                                          | 68.174(4)                                                   | 86.027(5)                                                    | 83.499(5)°                                                   |
| <i>V</i> [Å <sup>3</sup> ]      | 370.56(4)                                                   | 401.1(3)                                                    | 339.95(10)                                                   | 387.30(10)                                                   |
| <i>Z</i>                        | 2                                                           | 2                                                           | 2                                                            | 2                                                            |

|                                                   |                                   |                  |                                    |                                    |
|---------------------------------------------------|-----------------------------------|------------------|------------------------------------|------------------------------------|
| $T$ [K]                                           | 150(2)                            | 150(2)           | 150(2)                             | 150(2)                             |
| $\rho_{\text{calcd}}$ [Mg m <sup>-3</sup> ]       | 3.001                             | 2.889            | 2.481                              | 2.298                              |
| $\mu$ [mm <sup>-1</sup> ]                         | 8.396                             | 7.763            | 4.654                              | 4.091                              |
| $F(000)$                                          | 296                               | 312              | 236                                | 252                                |
| $\theta$ [°]                                      | 3.186 to 27.485                   | 2.928 to 30.405  | 3.016 to 25.507                    | 2.626 to 30.413                    |
| Index ranges                                      | -14<= $h$ <=14                    | -9<= $h$ <=10    | -8<= $h$ <=8                       | -9<= $h$ <=9                       |
|                                                   | -5<= $k$ <=5                      | -10<= $k$ <=10   | -8<= $k$ <=8                       | -9<= $k$ <=10                      |
|                                                   | -9<= $l$ <=10                     | -0<= $l$ <=11    | -9<= $l$ <=9                       | -12<= $l$ <=12                     |
| Reflections collected                             | 3581                              | 2117             | 2656                               | 4209                               |
| Independent reflections ( $R_{\text{int}}$ )      | 838 [ $R_{\text{int}} = 0.0397$ ] | 2117             | 1247 [ $R_{\text{int}} = 0.0342$ ] | 2103 [ $R_{\text{int}} = 0.0276$ ] |
| Data/restraints/parameters                        | 838 / 1 / 41                      | 2117 / 0 / 84    | 1247 / 0 / 92                      | 2103 / 0 / 101                     |
| GOF on $F^2$                                      | 1.088                             | 1.165            | 1.065                              | 1.049                              |
| $R_1$ ( $I > 2\delta(I)$ ) <sup>a</sup>           | 0.0186                            | 0.0308           | 0.0312                             | 0.0283                             |
| $wR_2$ ( $I > 2\delta(I)$ ) <sup>b</sup>          | 0.0452                            | 0.0808           | 0.0762                             | 0.0648                             |
| $R_1$ (all data)                                  | 0.0187                            | 0.0344           | 0.0341                             | 0.0351                             |
| $wR_2$ (all data)                                 | 0.0453                            | 0.0831           | 0.0788                             | 0.0675                             |
| Largest diff. peak and hole [e. Å <sup>-3</sup> ] | 0.816 and -0.716                  | 1.489 and -1.117 | 1.083 and -1.189                   | 1.243 and -1.382                   |

---


$$^a R_1 = \sum ||F_0| - |F_c|| / \sum |F_0| \quad ^b R_2 = [\sum w(F_0^2 - F_c^2)^2 / \sum w(F_0^2)^2]^{1/2}$$


---

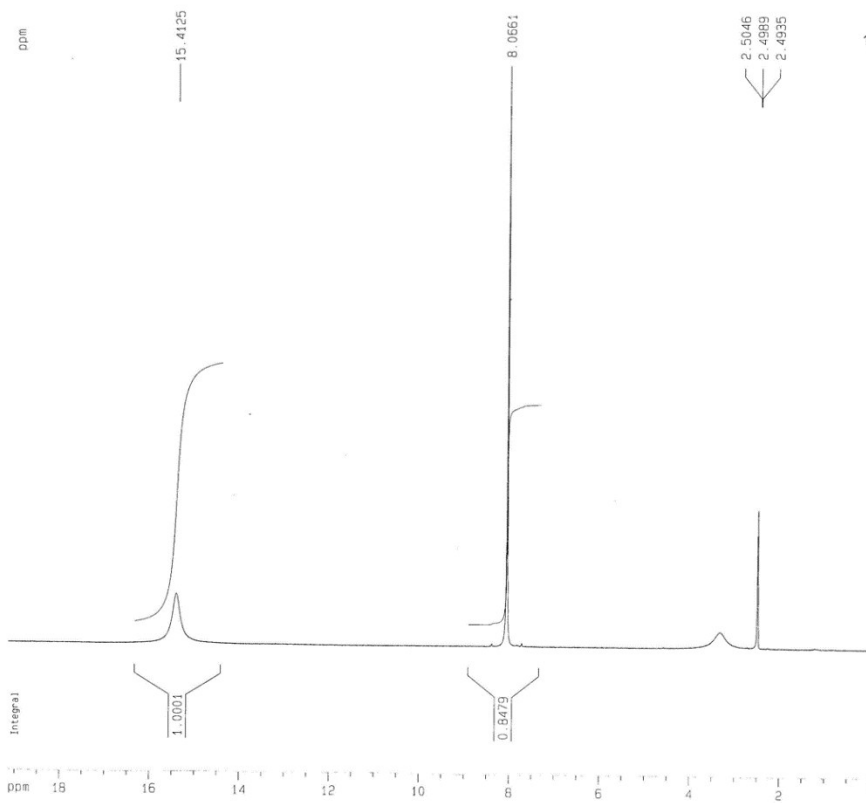

Current Data Parameters  
 NAME dpkqnp1H  
 EXPNO 1755  
 PROCNO 1

F2 - Acquisition Parameters  
 Date\_ 20150829  
 Time 10.03  
 INSTRUM spect  
 PROBHD 5 mm QNP 1H/13  
 PULPROG zg  
 TD 32768  
 SOLVENT Acetone  
 NS 8  
 DS 0  
 SWH 7267.442 Hz  
 FIDRES 0.221785 Hz  
 AQ 2.2544885 sec  
 RG 512  
 DW 68.800 usec  
 DE 6.00 usec  
 TE 300.0 K  
 D1 1.0000000 sec

\*\*\*\*\* CHANNEL f1 \*\*\*\*\*  
 NUC1 1H  
 P1 3.00 usec  
 PL1 -4.00 dB  
 SF01 300.1323664 MHz

F2 - Processing parameters  
 SI 32768  
 SF 300.1300028 MHz  
 WDW EM  
 SSB 0  
 LB 0.30 Hz  
 GB 0  
 PC 1.00

ID NMR plot parameters  
 CX 20.00 cm  
 CY 12.50 cm  
 F1P 19.143 ppm  
 F1 9745.42 Hz  
 F2P -0.067 ppm  
 F2 -20.02 Hz  
 PPMCM 0.96049 ppm/cm  
 HZCM 268.27206 Hz/cm

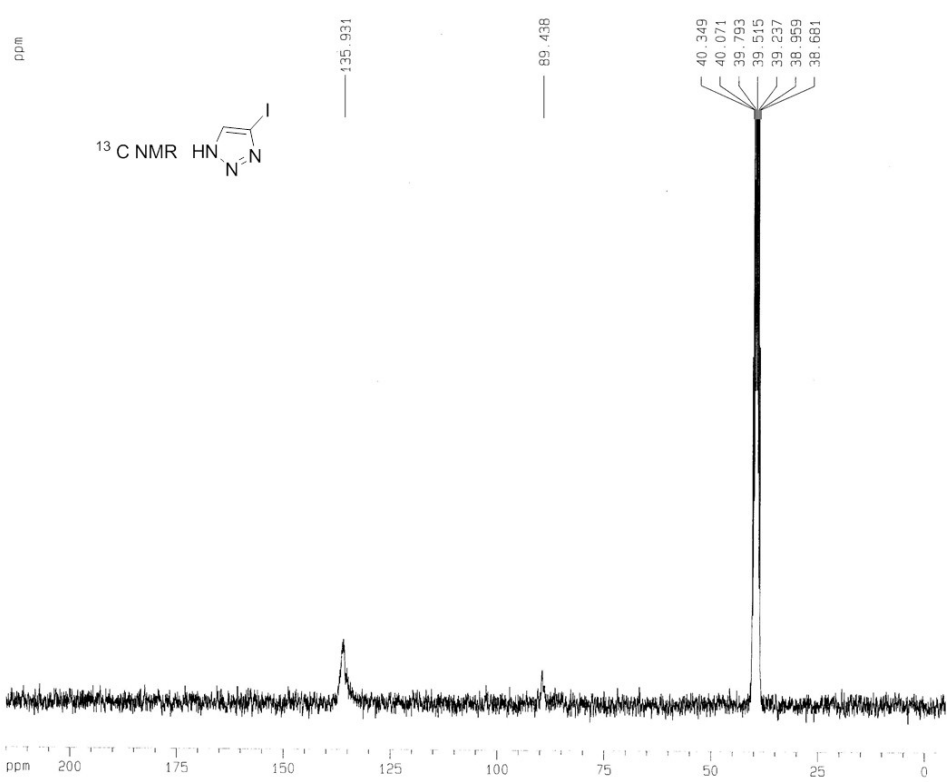

Current Data Parameters  
 NAME dpkqnp13C  
 EXPNO 1681  
 PROCNO 1

F2 - Acquisition Parameters  
 Date\_ 20150829  
 Time 10.07  
 INSTRUM spect  
 PROBHD 5 mm QNP 1H/13  
 PULPROG zgpg30  
 TD 32768  
 SOLVENT CDCl3  
 NS 2975  
 DS 0  
 SWH 17985.611 Hz  
 FIDRES 0.548877 Hz  
 AQ 0.9110004 sec  
 RG 16390.4  
 DW 27.800 usec  
 DE 6.00 usec  
 TE 300.0 K  
 D1 1.0000000 sec  
 d11 0.0300000 sec  
 d12 0.0000200 sec

\*\*\*\*\* CHANNEL f1 \*\*\*\*\*  
 NUC1 13C  
 P1 4.00 usec  
 PL1 -5.00 dB  
 SF01 75.4752953 MHz

\*\*\*\*\* CHANNEL f2 \*\*\*\*\*  
 CPDPRG2 waltz16  
 NUC2 1H  
 PCPD2 100.00 usec  
 PL2 120.00 dB  
 PL12 17.00 dB  
 PL13 17.00 dB  
 SF02 300.1312005 MHz

F2 - Processing parameters  
 SI 32768  
 SF 75.4677886 MHz  
 WDW EM  
 SSB 0  
 LB 3.00 Hz  
 GB 0  
 PC 1.40

ID NMR plot parameters  
 CX 20.00 cm  
 CY 50.00 cm  
 F1P 215.000 ppm  
 F1 16225.58 Hz  
 F2P -5.000 ppm  
 F2 -373.34 Hz  
 PPMCM 11.00000 ppm/cm  
 HZCM 830.14563 Hz/cm

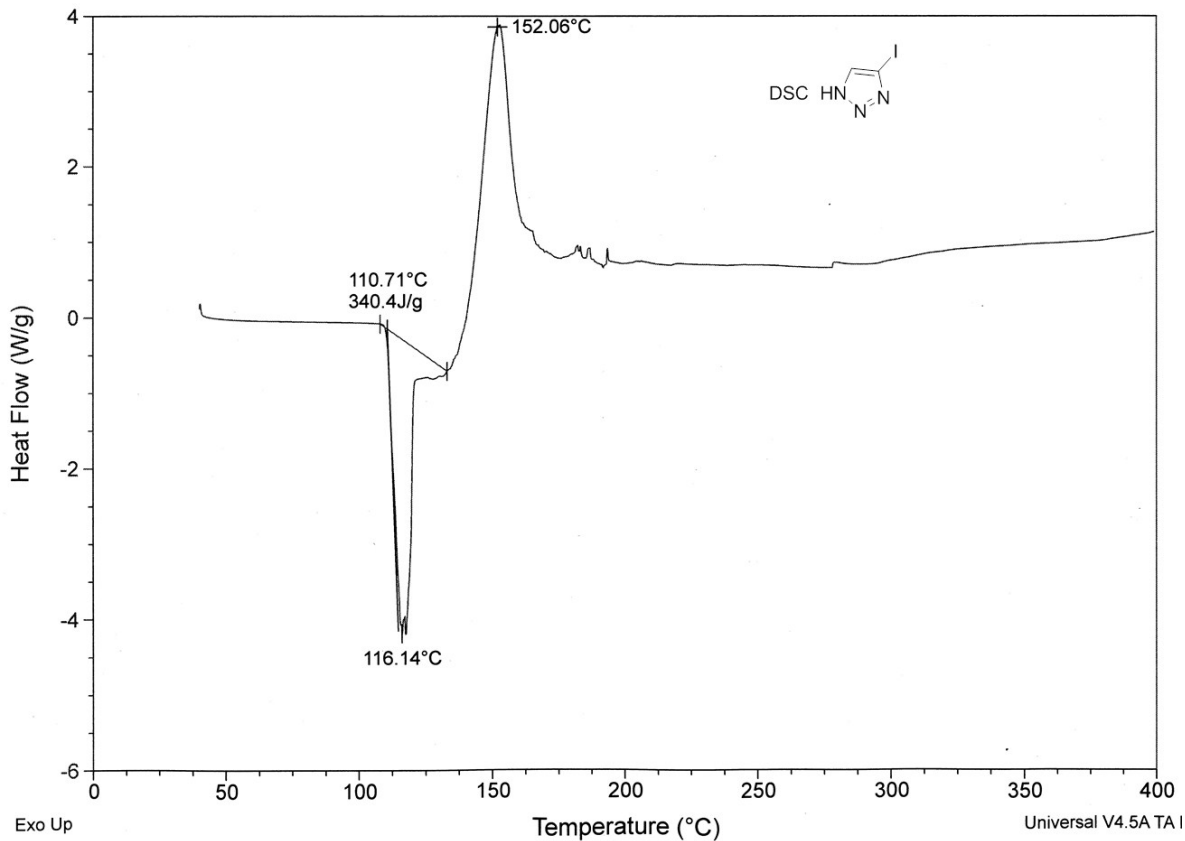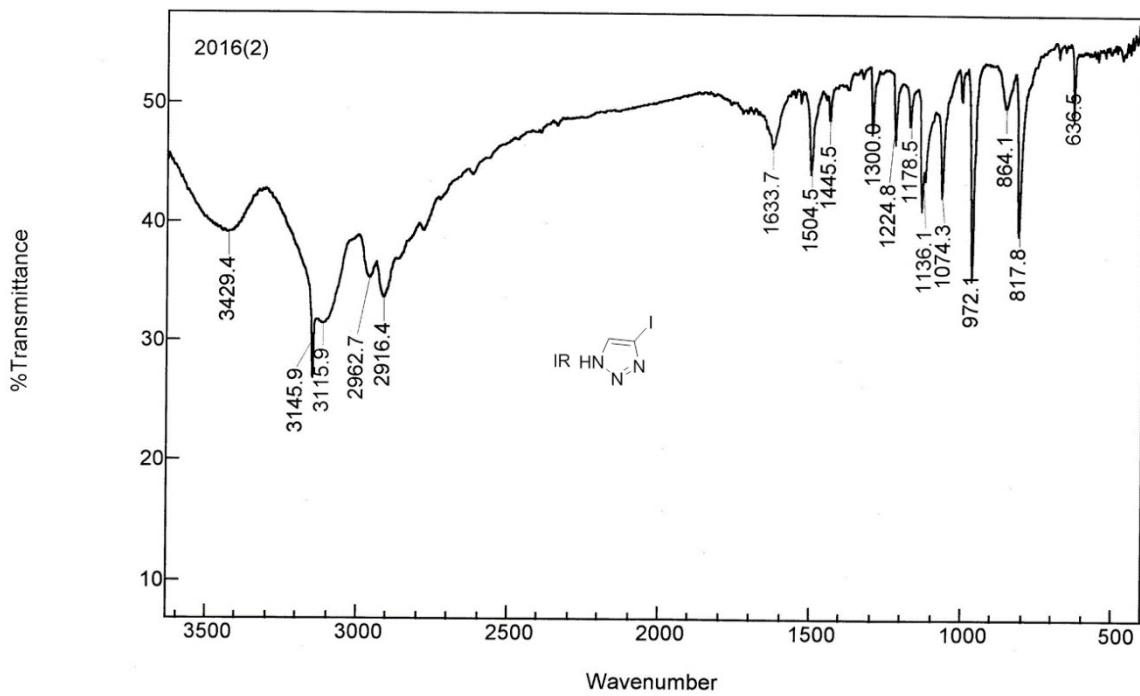

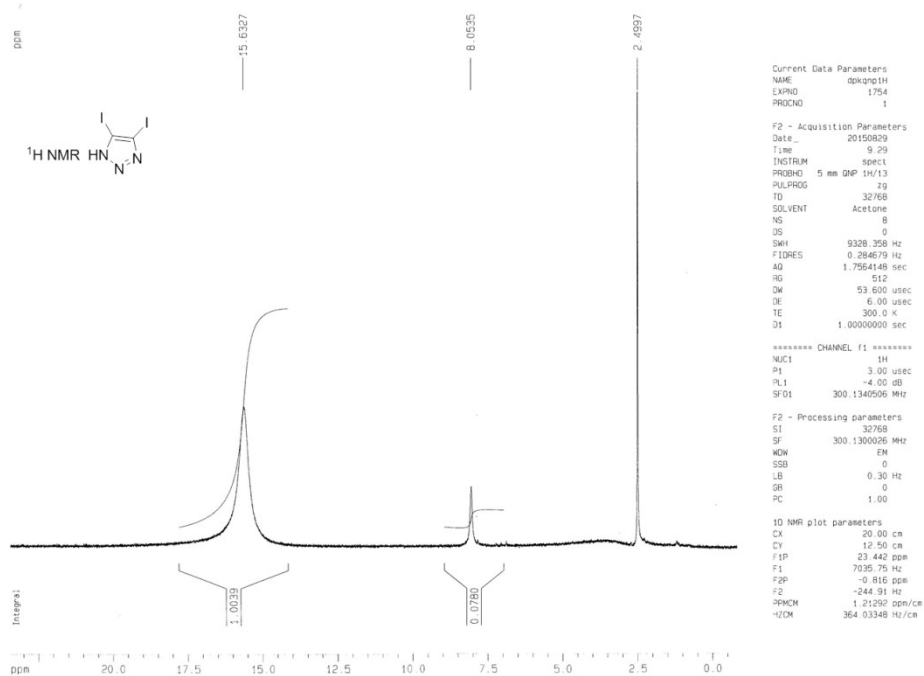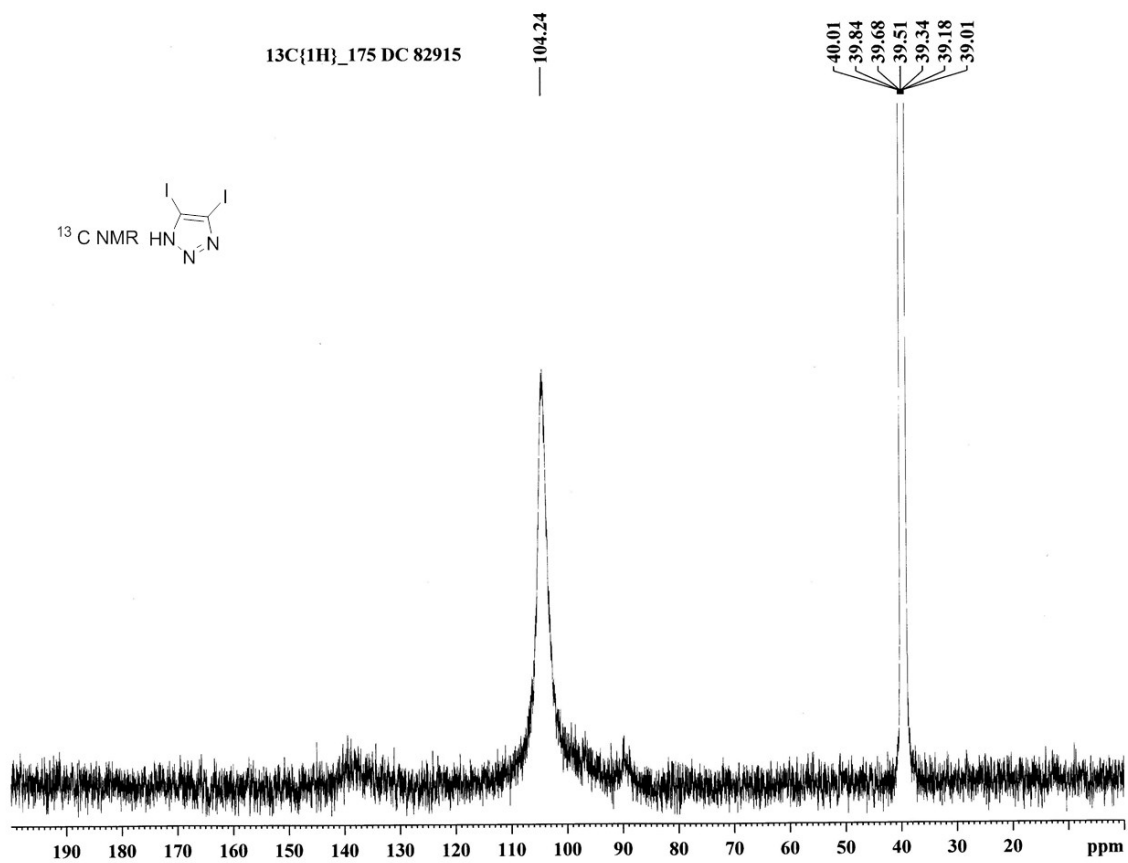

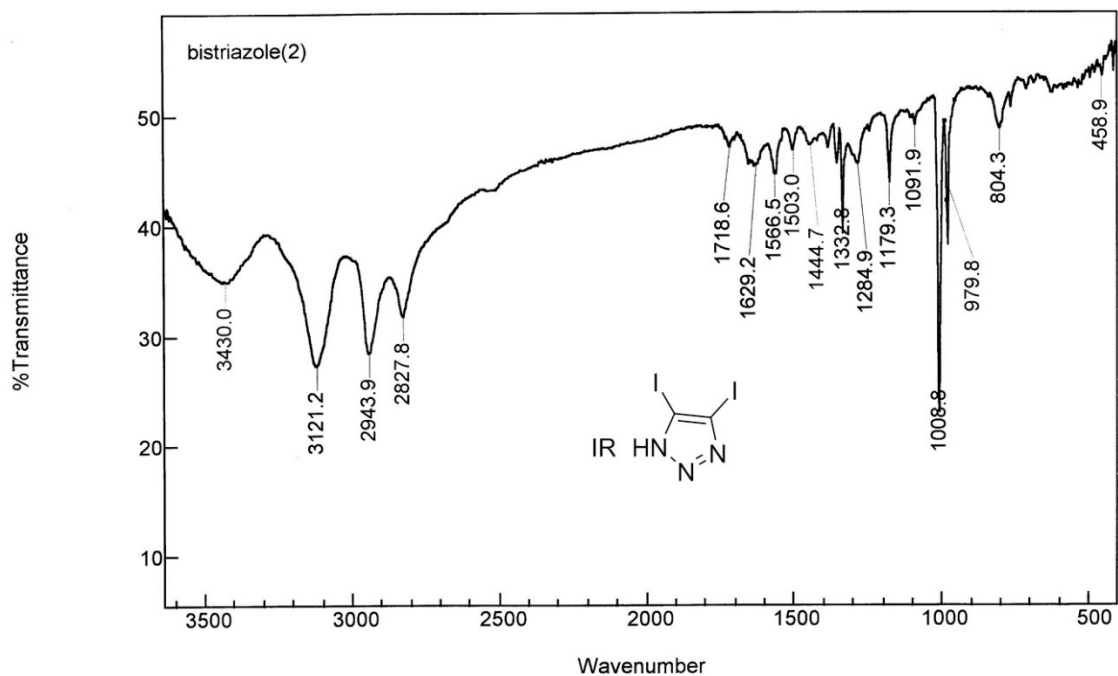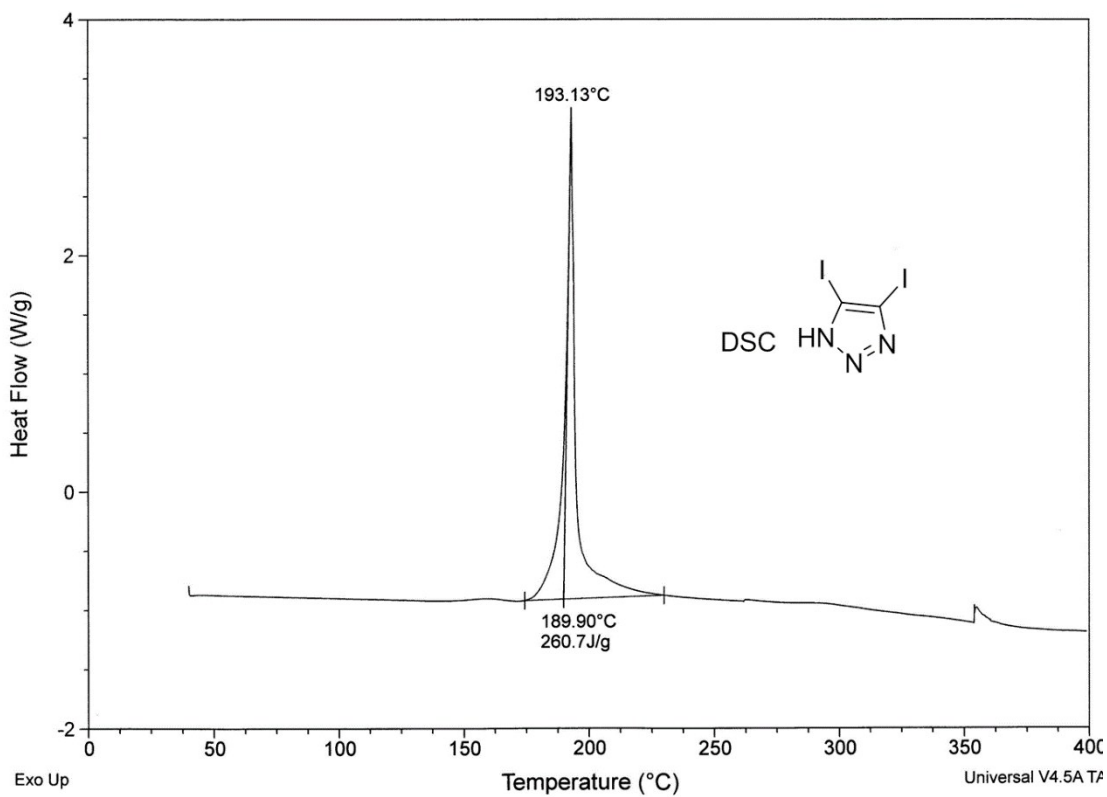



<sup>1</sup>H\_325 DC 1022615\_2

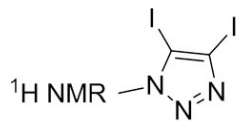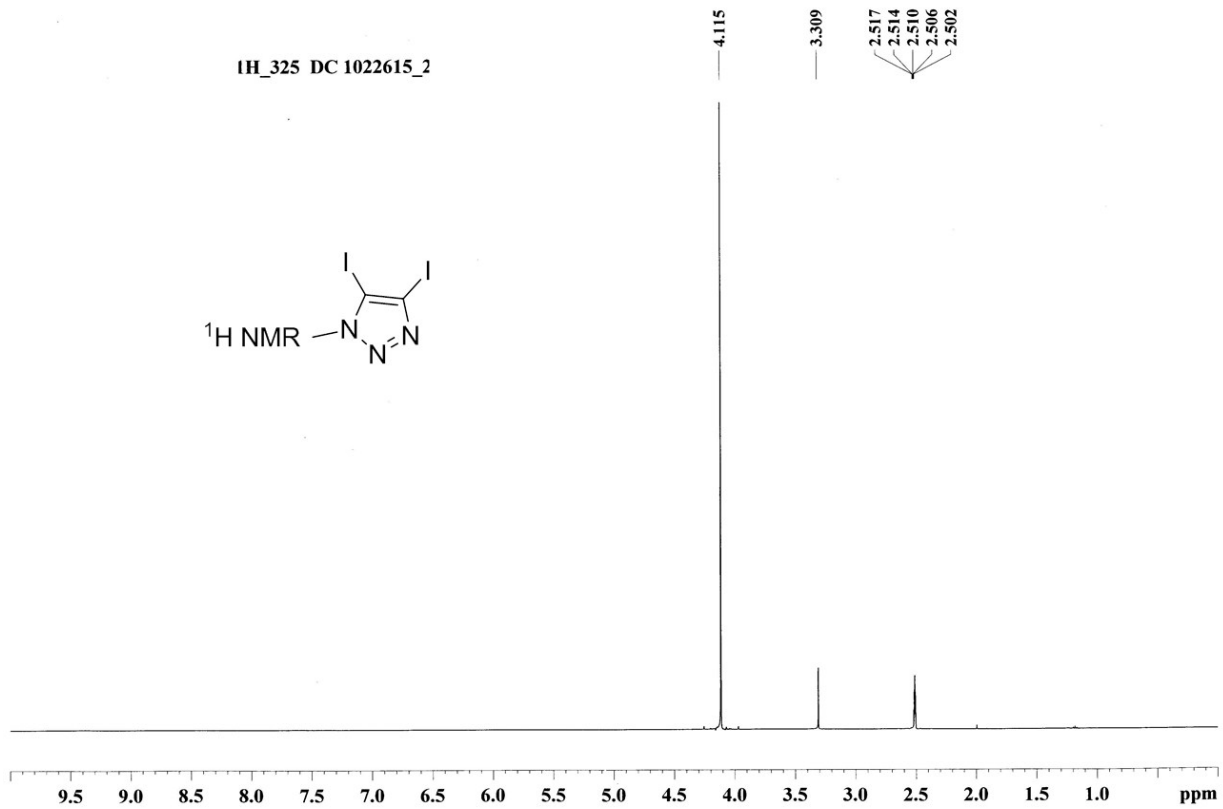

<sup>13</sup>C{<sup>1</sup>H}\_324 DC 1022615\_2

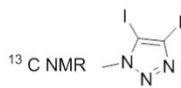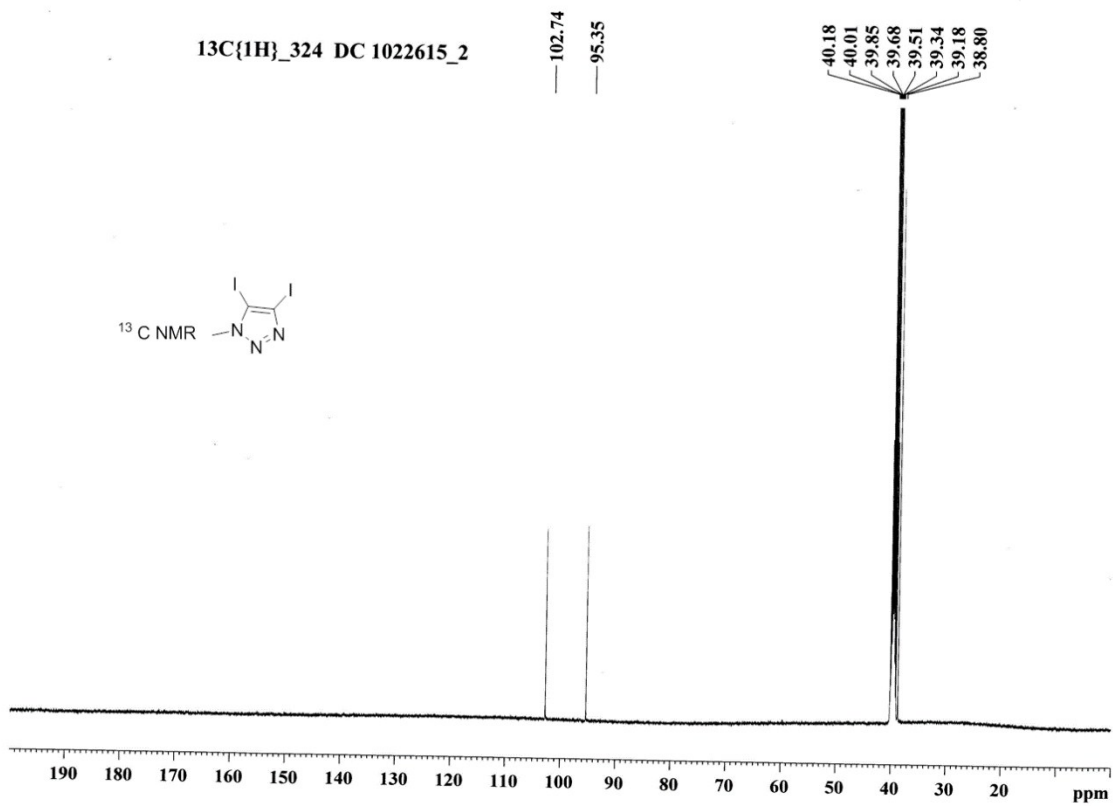

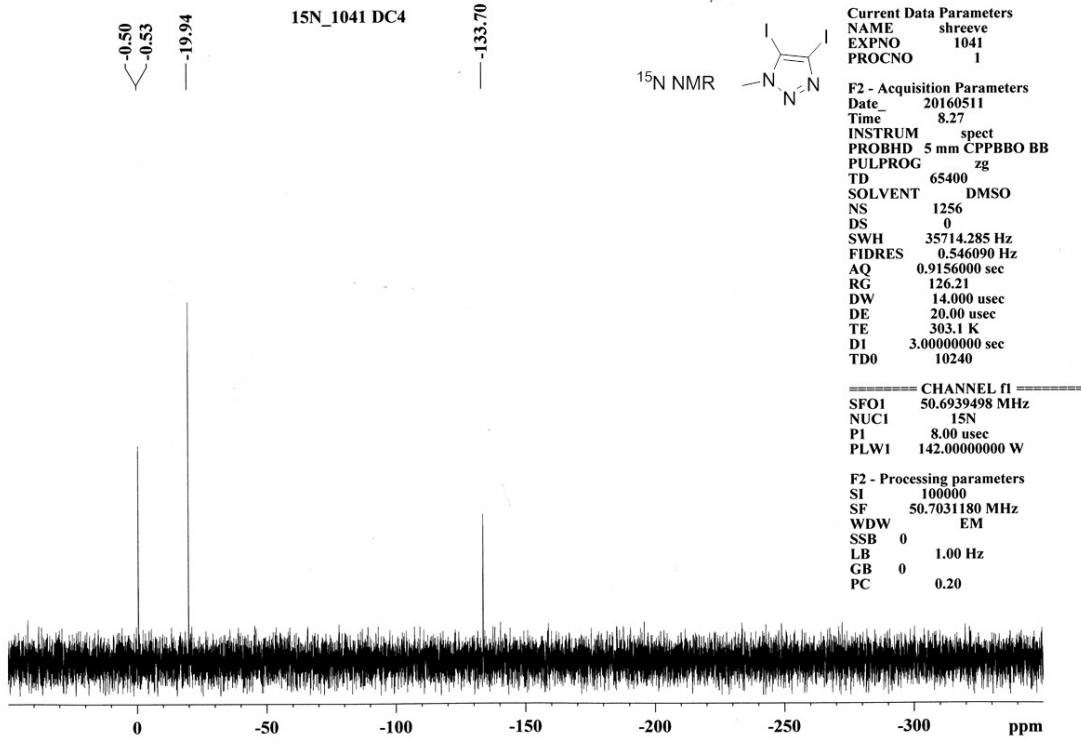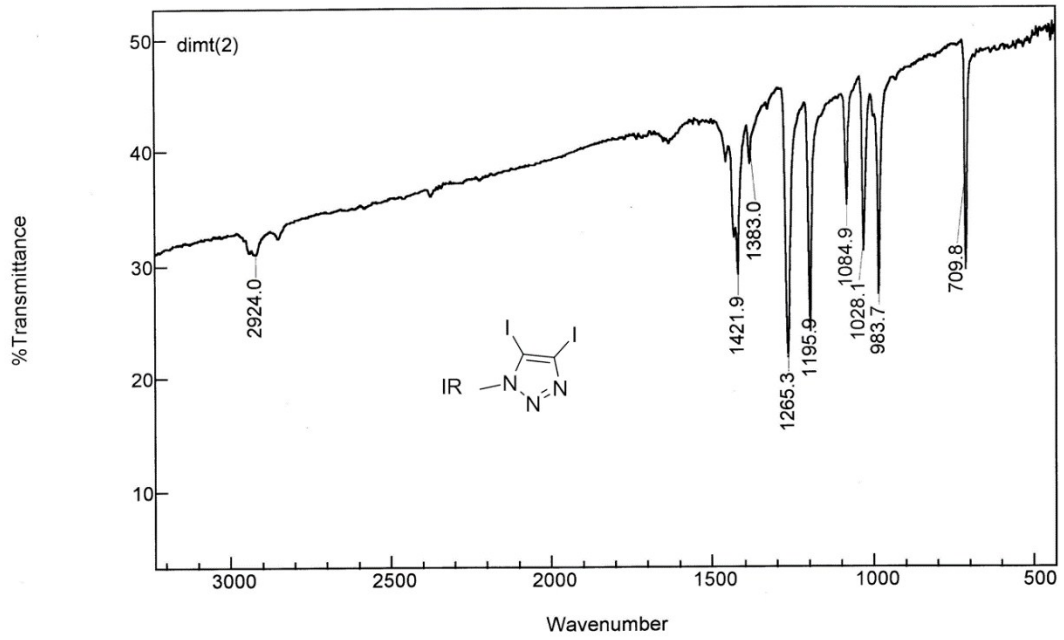

Sample: diiodomethyltriazole-b  
Size: 1.2000 mg  
Method: Ramp

### DSC

File: C:\...Deepak\diiodomethyltriazole-b  
Operator: dc  
Run Date: 26-Oct-2015 14:24  
Instrument: DSC Q20 V24.11 Build 124

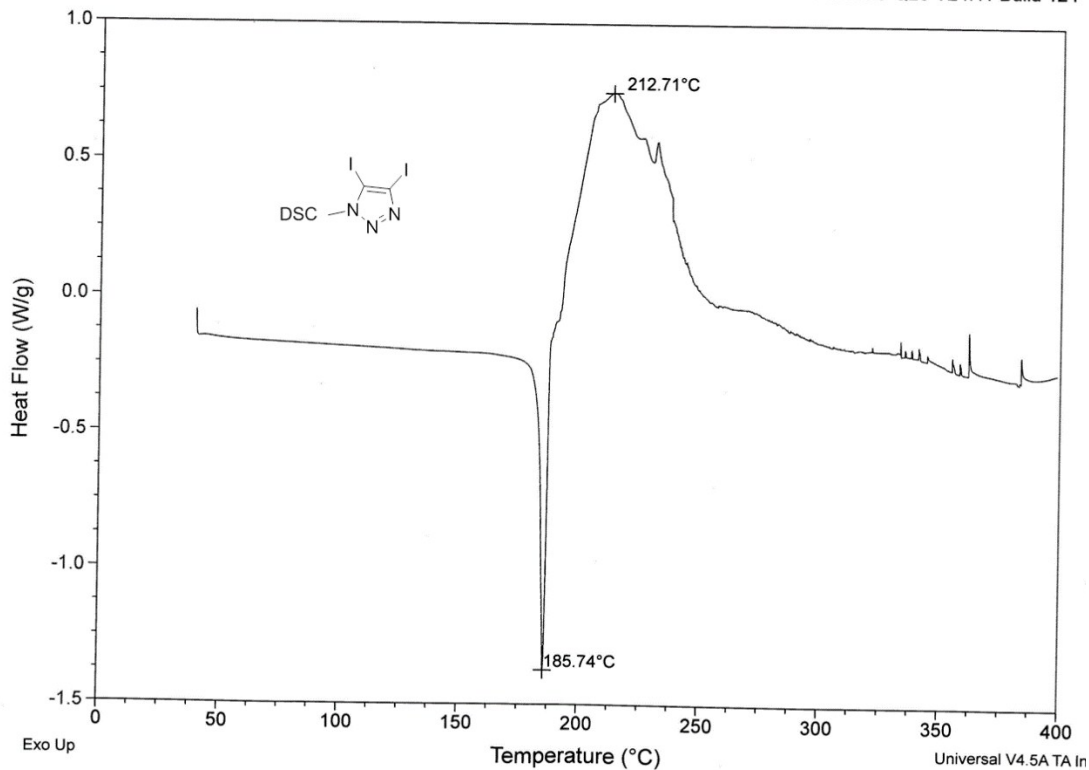

<sup>13</sup>C{<sup>1</sup>H}\_322 DC 1022615\_1

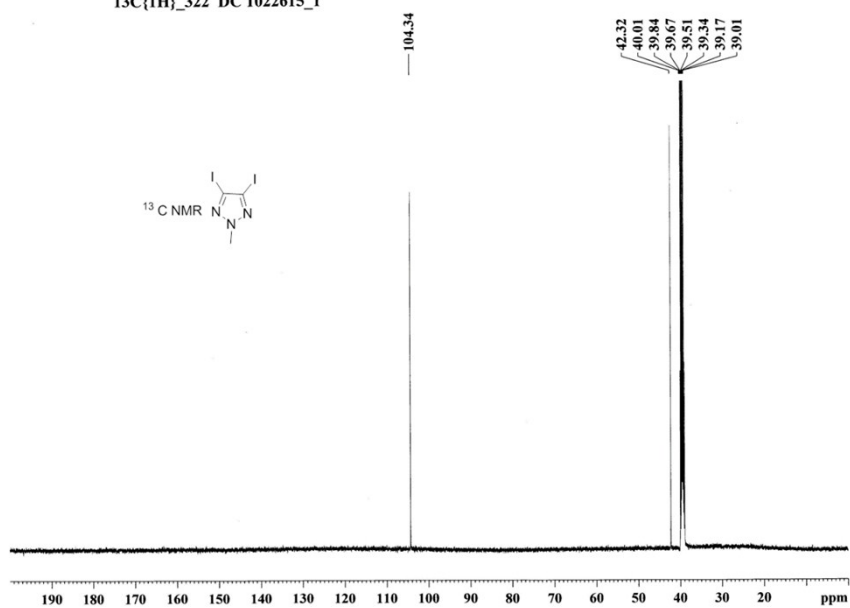

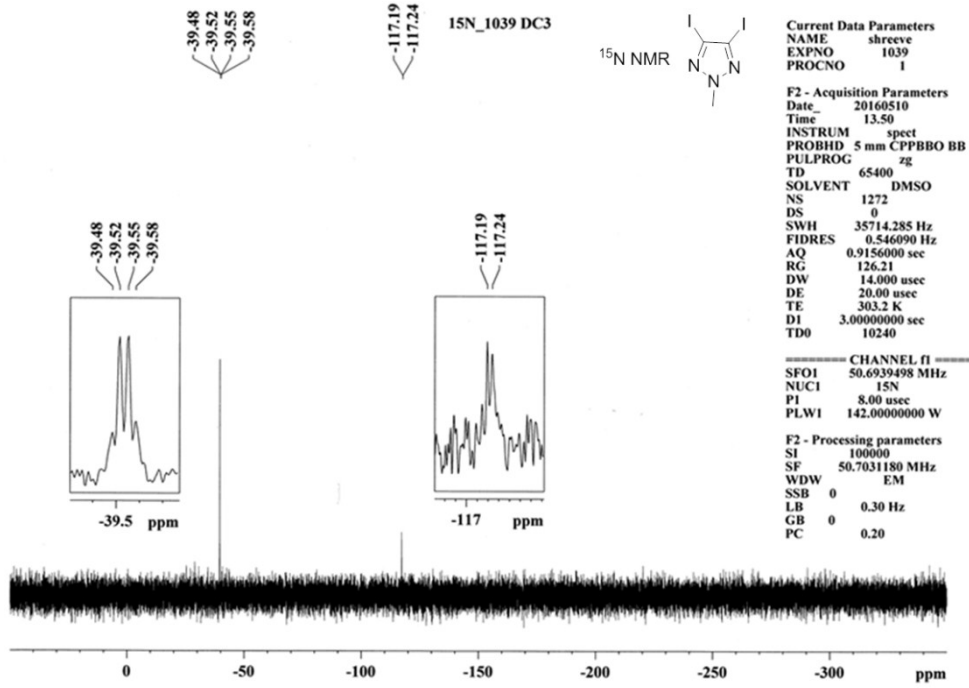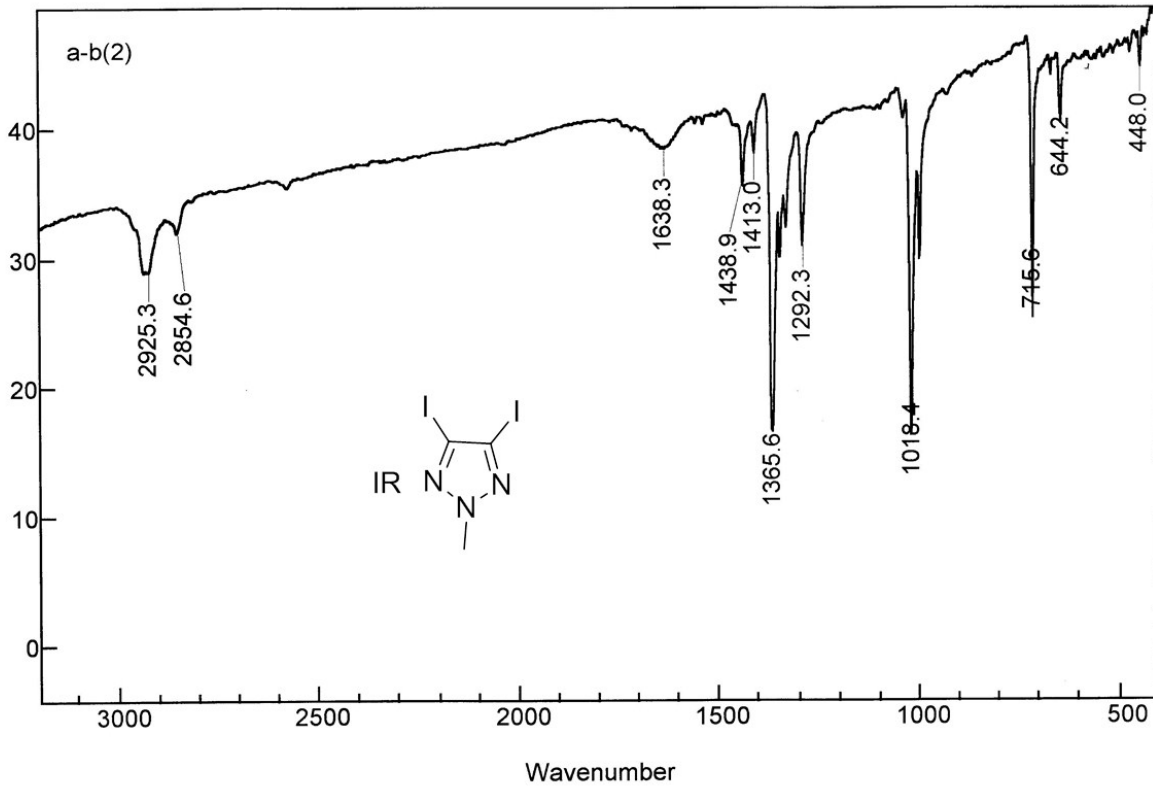

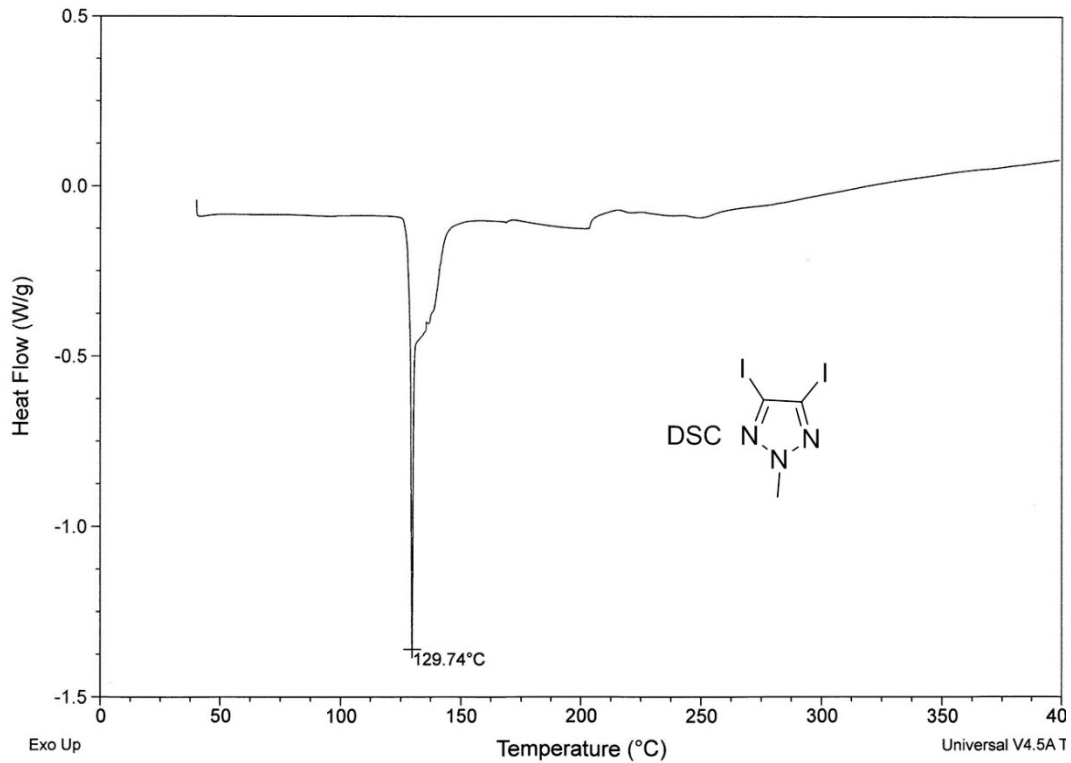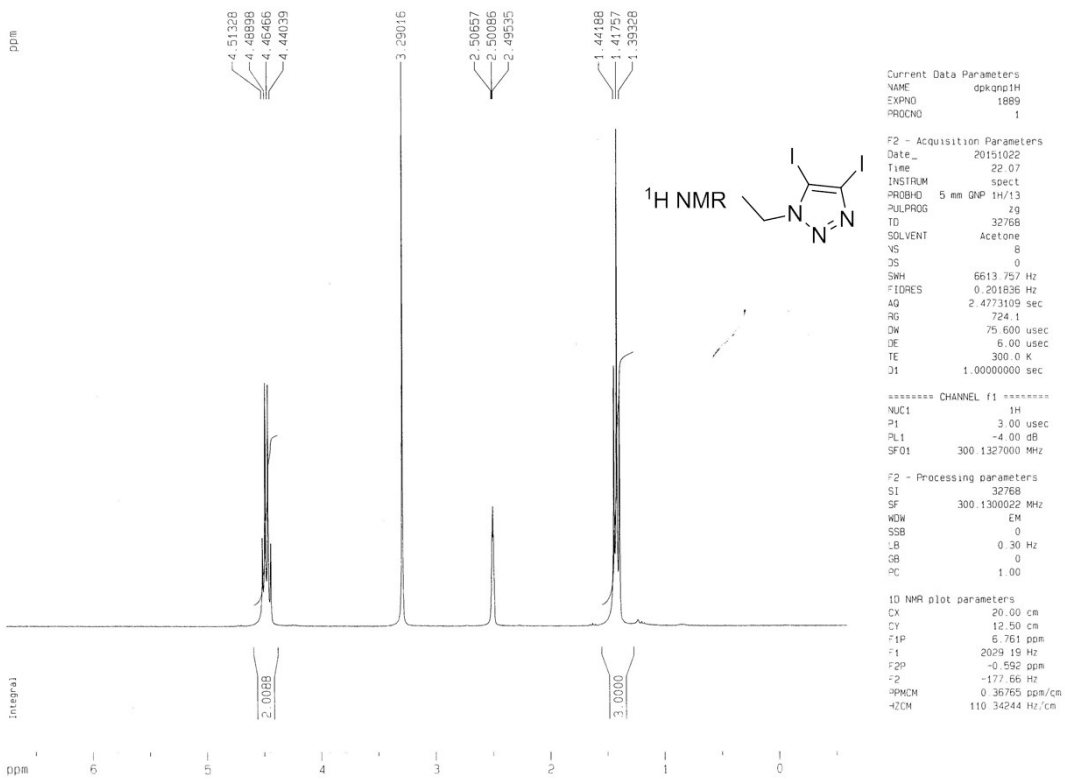

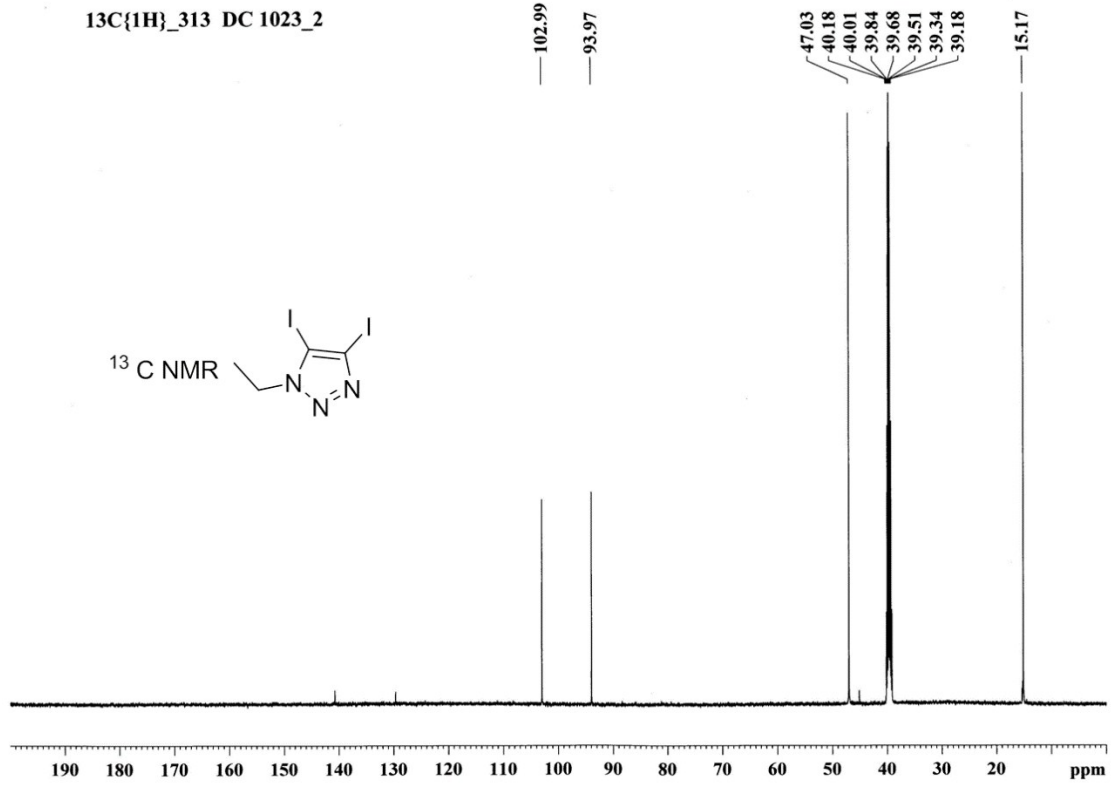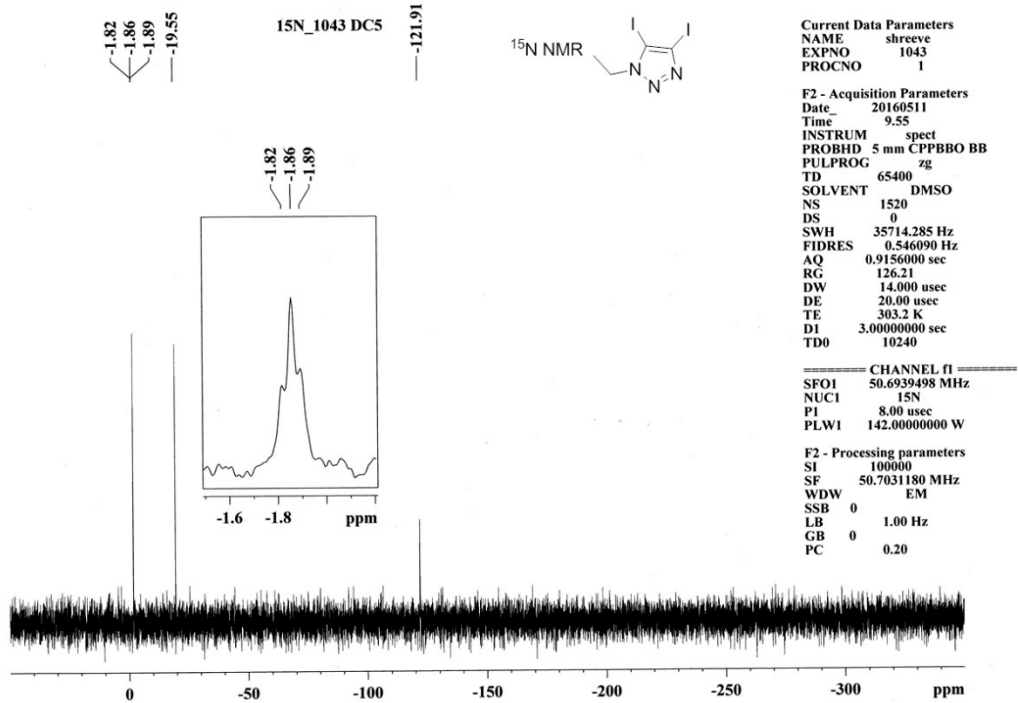

Bio-Rad Merlin

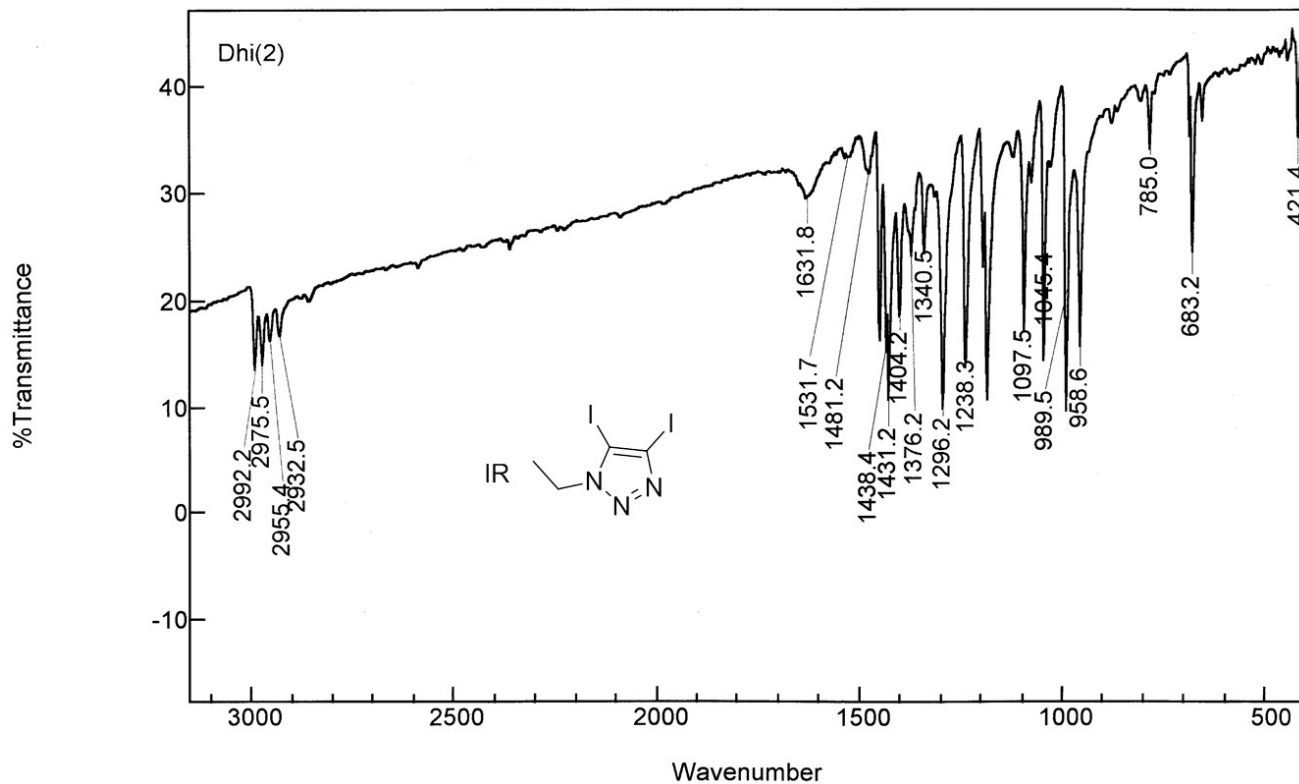

Sample: DC  
 Size: 1.0000 mg  
 Method: Ramp

DSC

File: C:\TA\Data\DSC\Deepak\DC.001  
 Operator: DC  
 Run Date: 23-Oct-2015 09:39  
 Instrument: DSC Q20 V24.11 Build 124

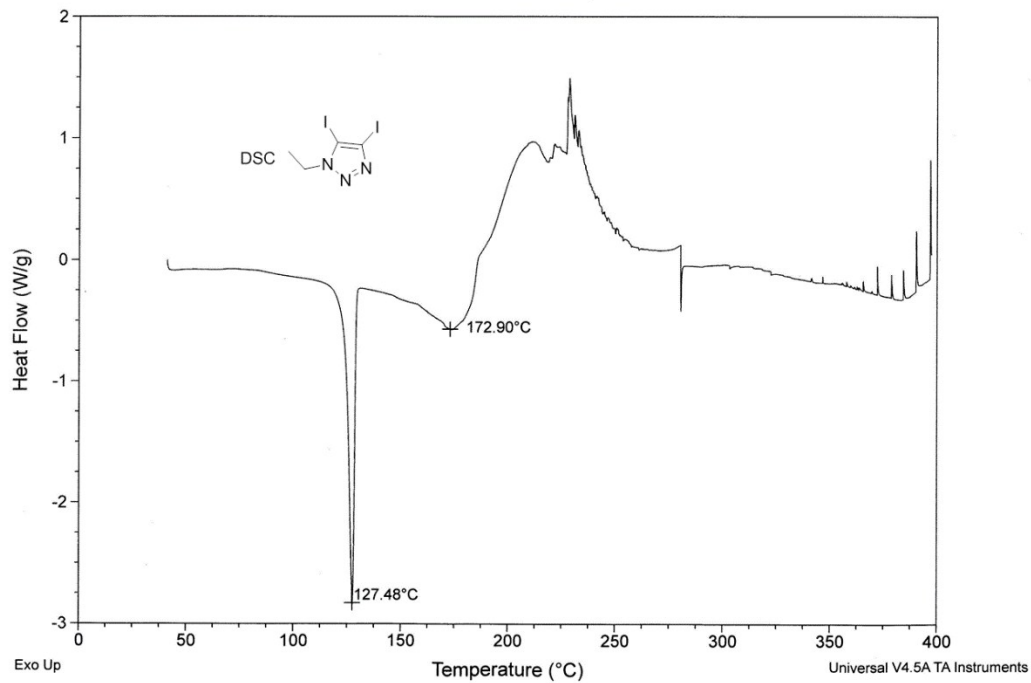

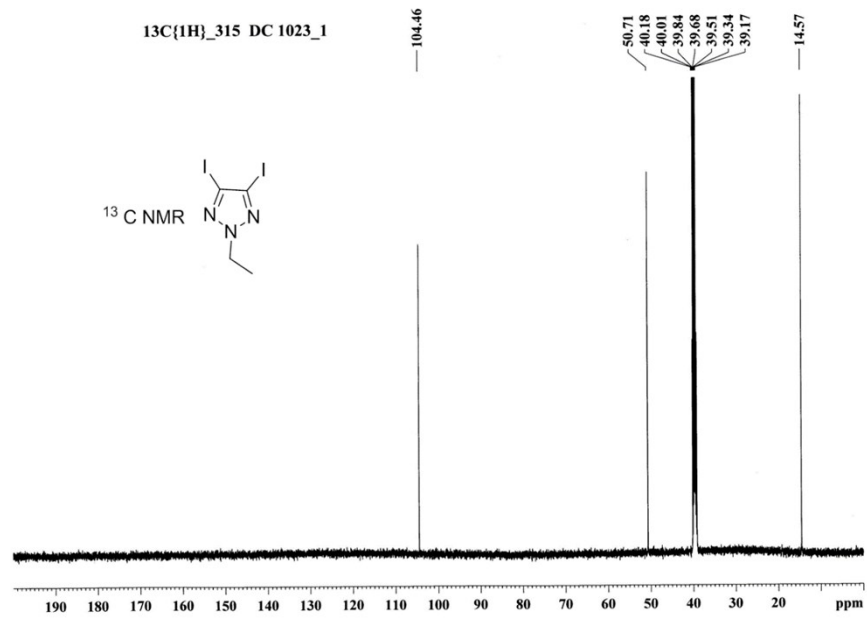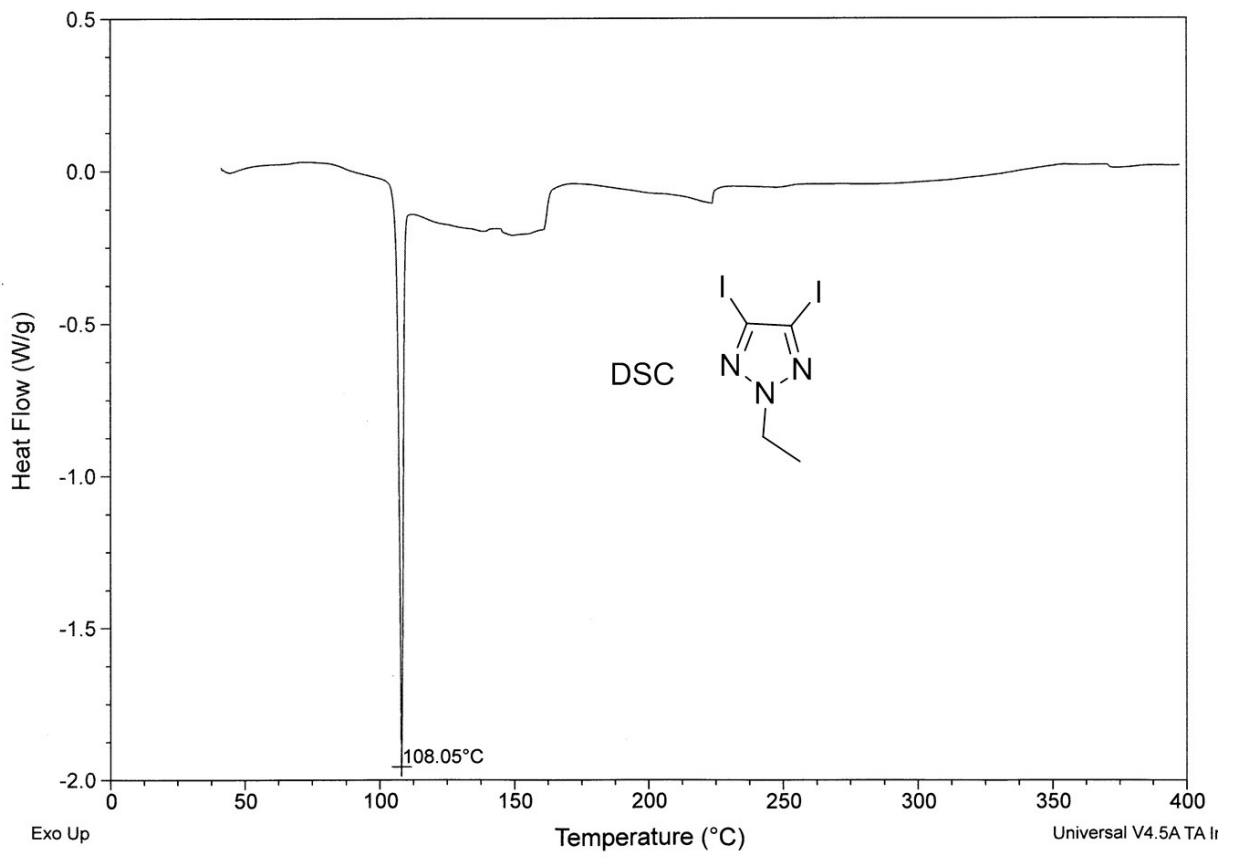



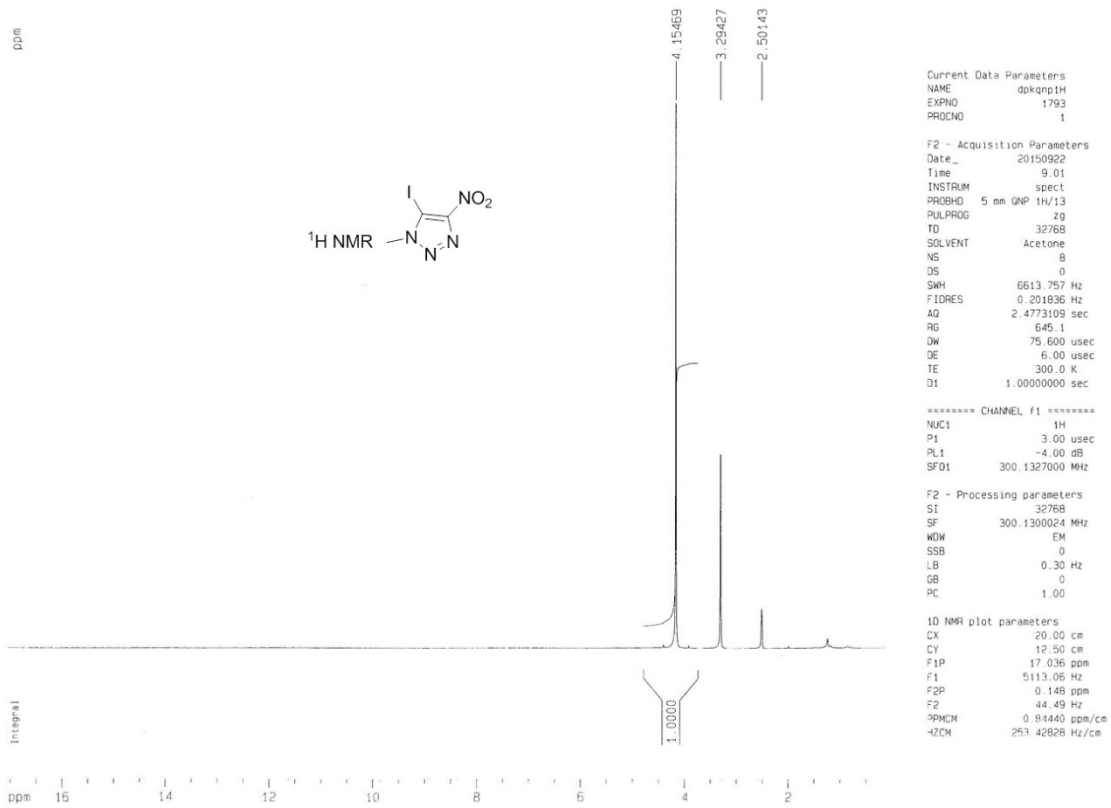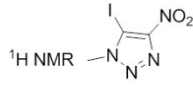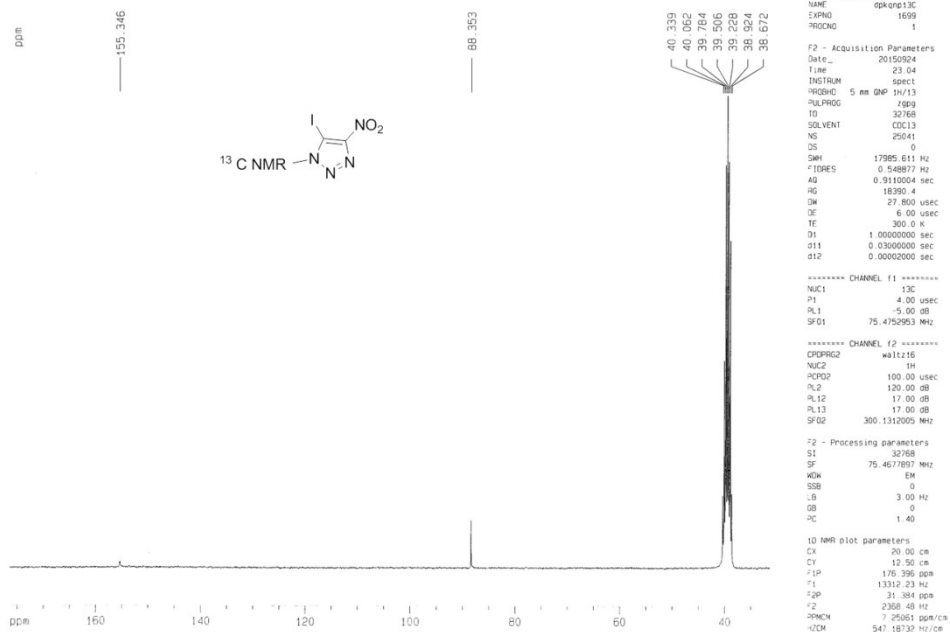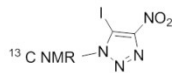

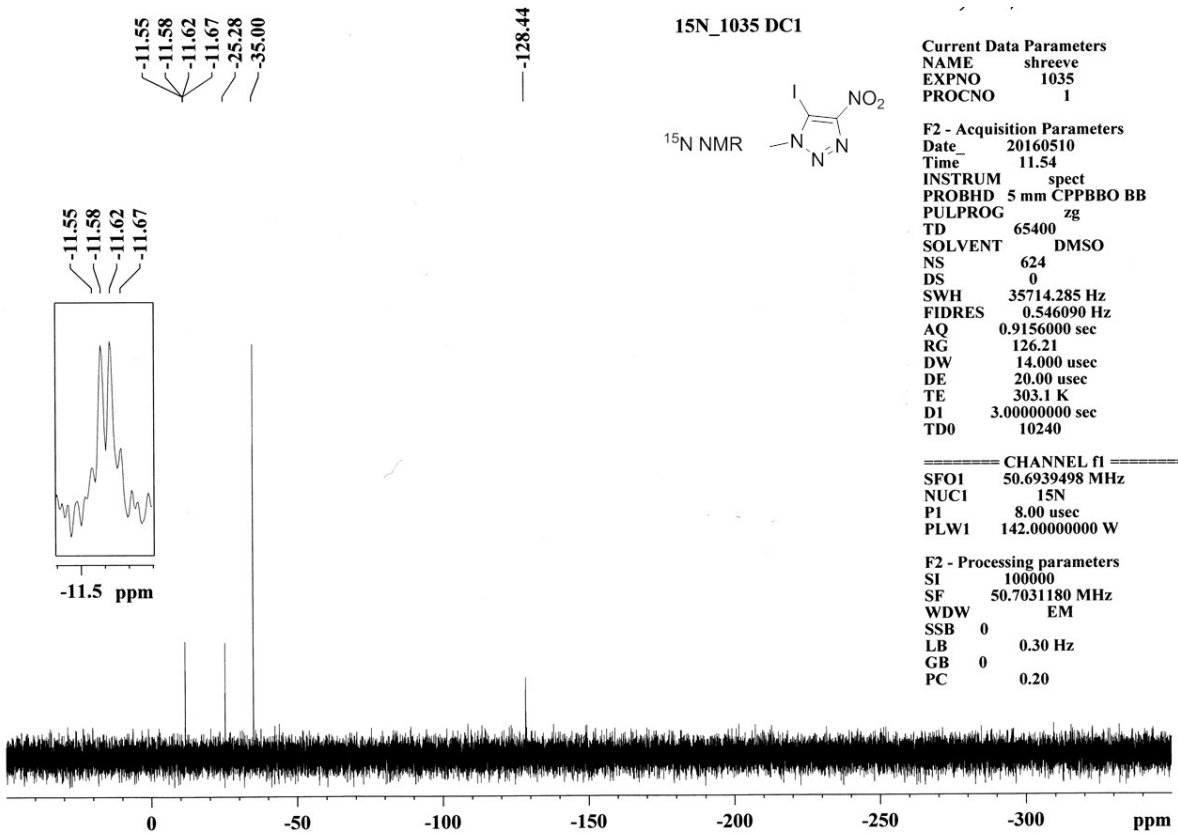

**Bio-Rad Merlin**

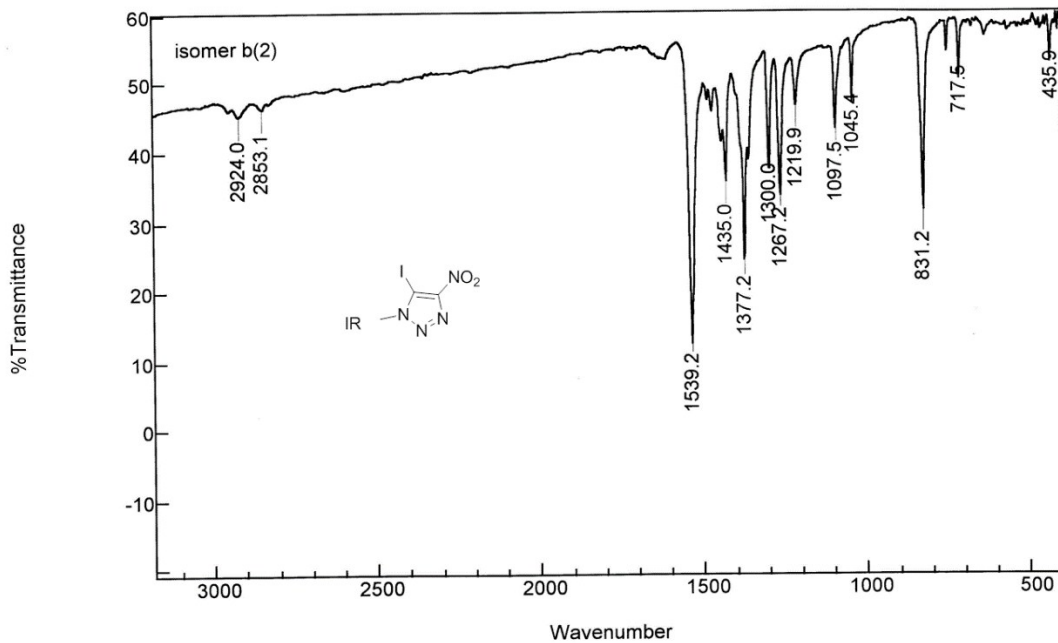

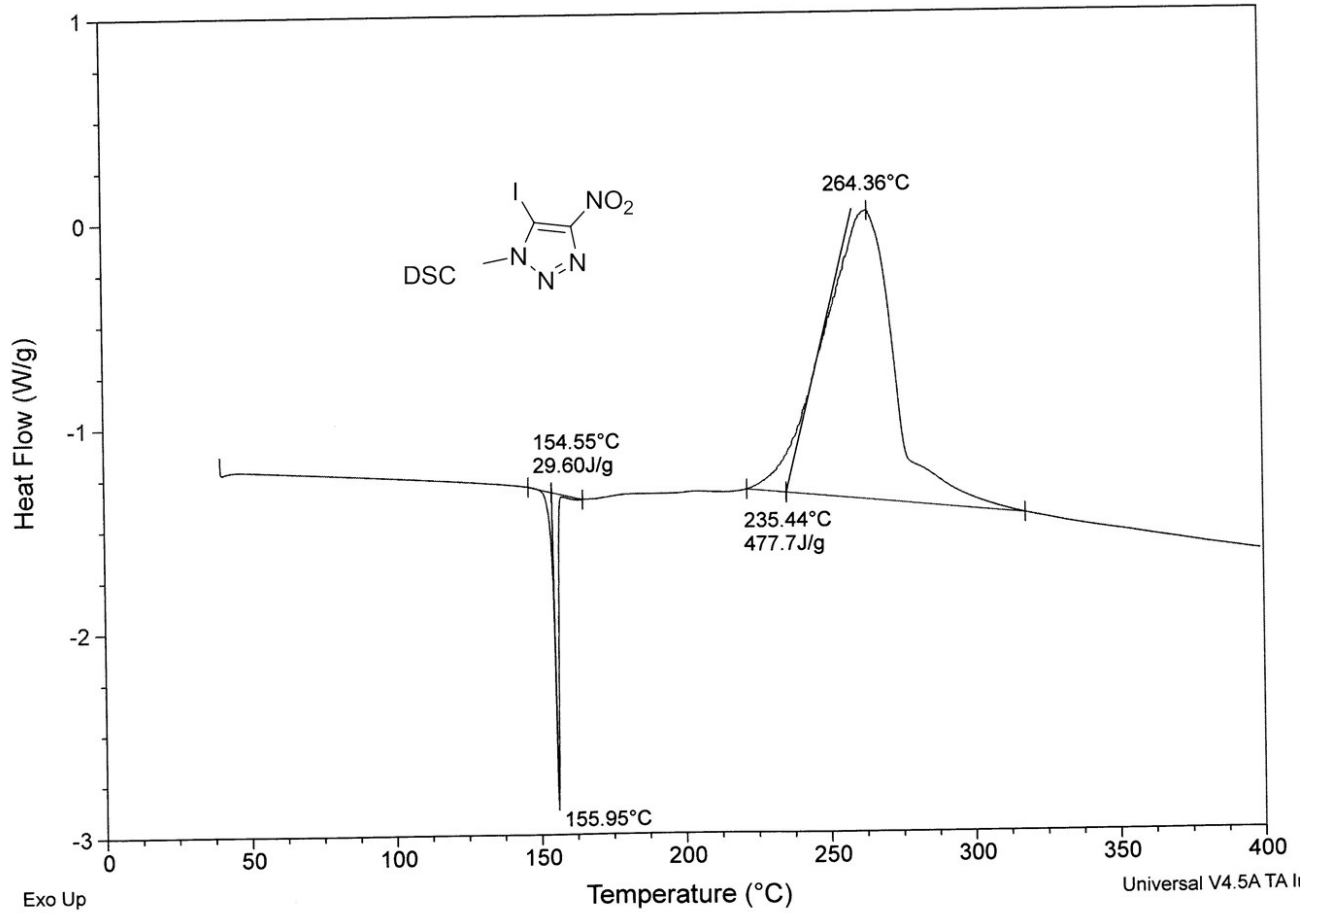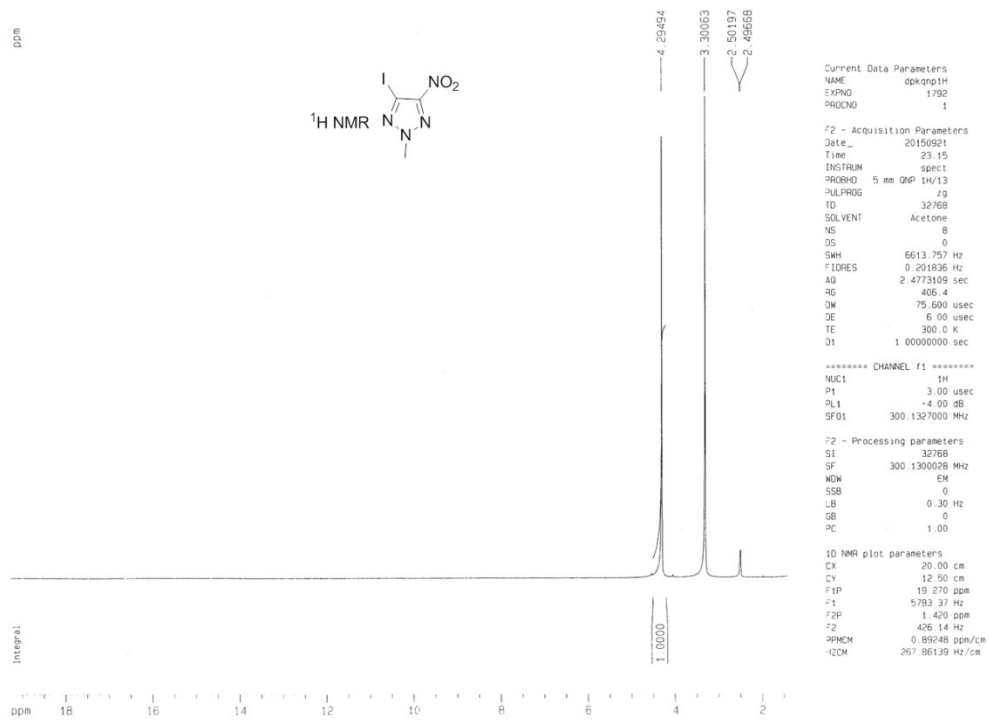

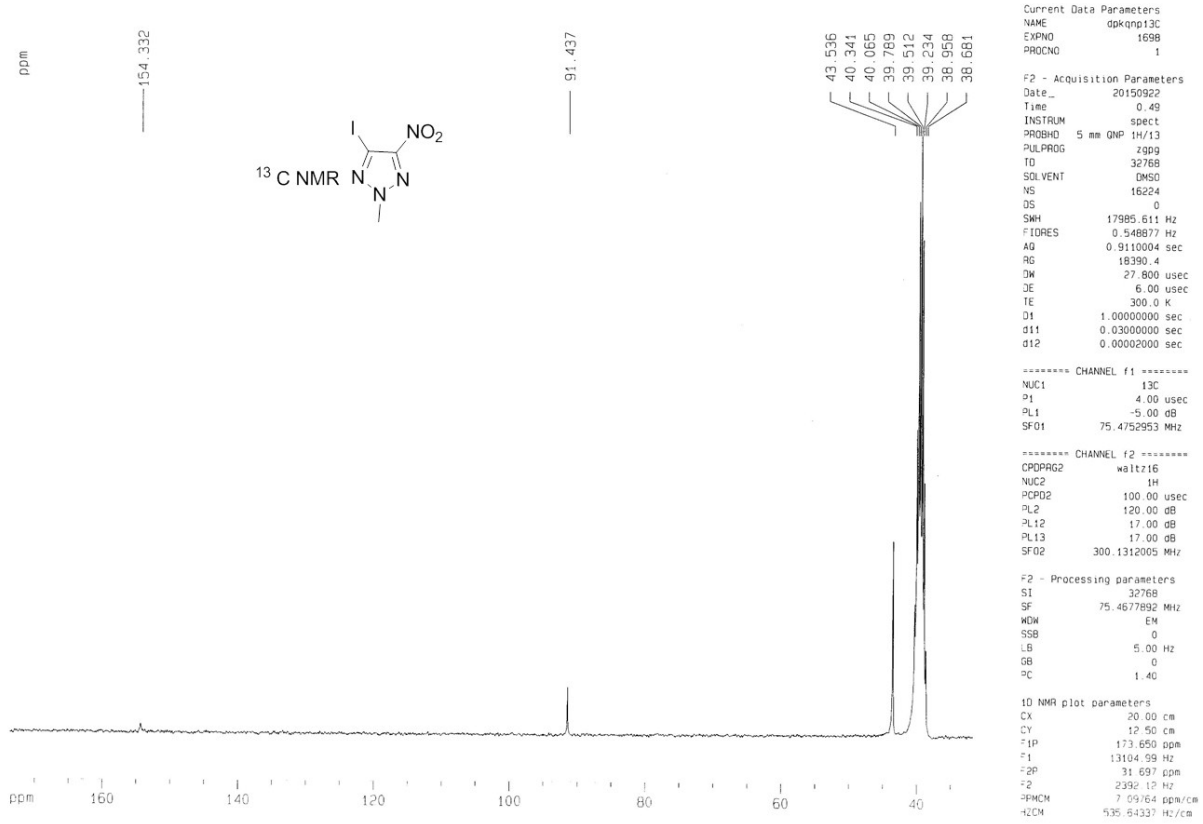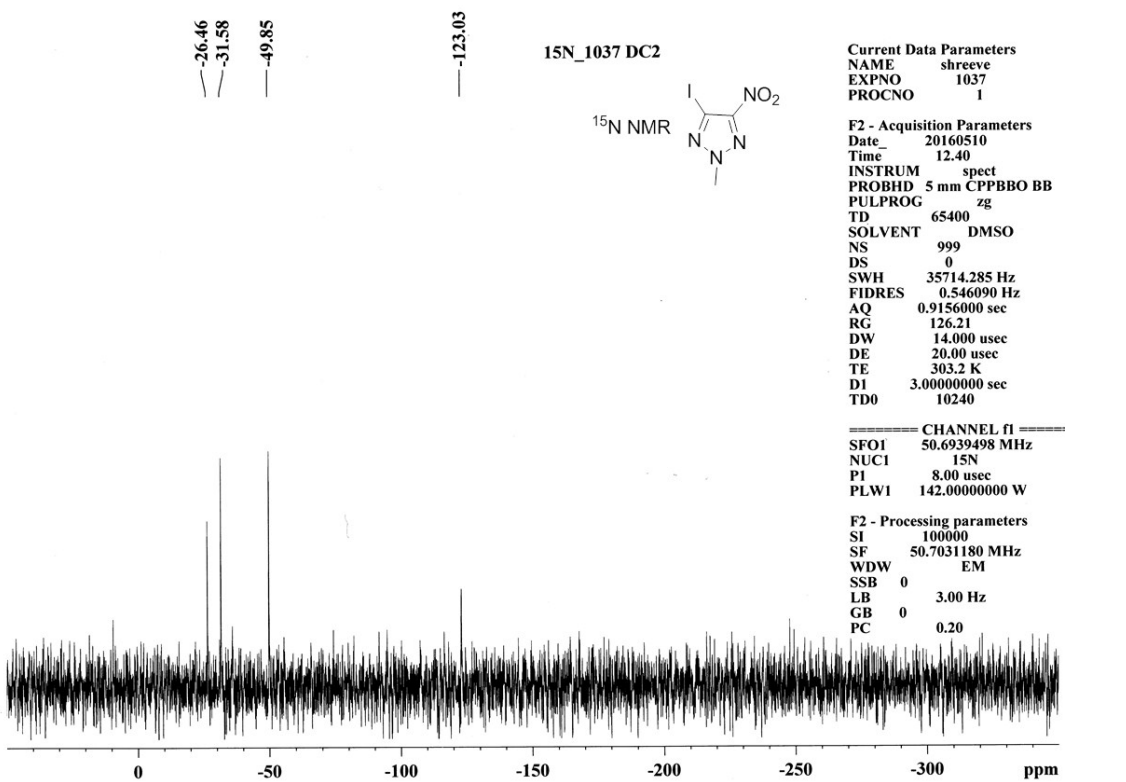

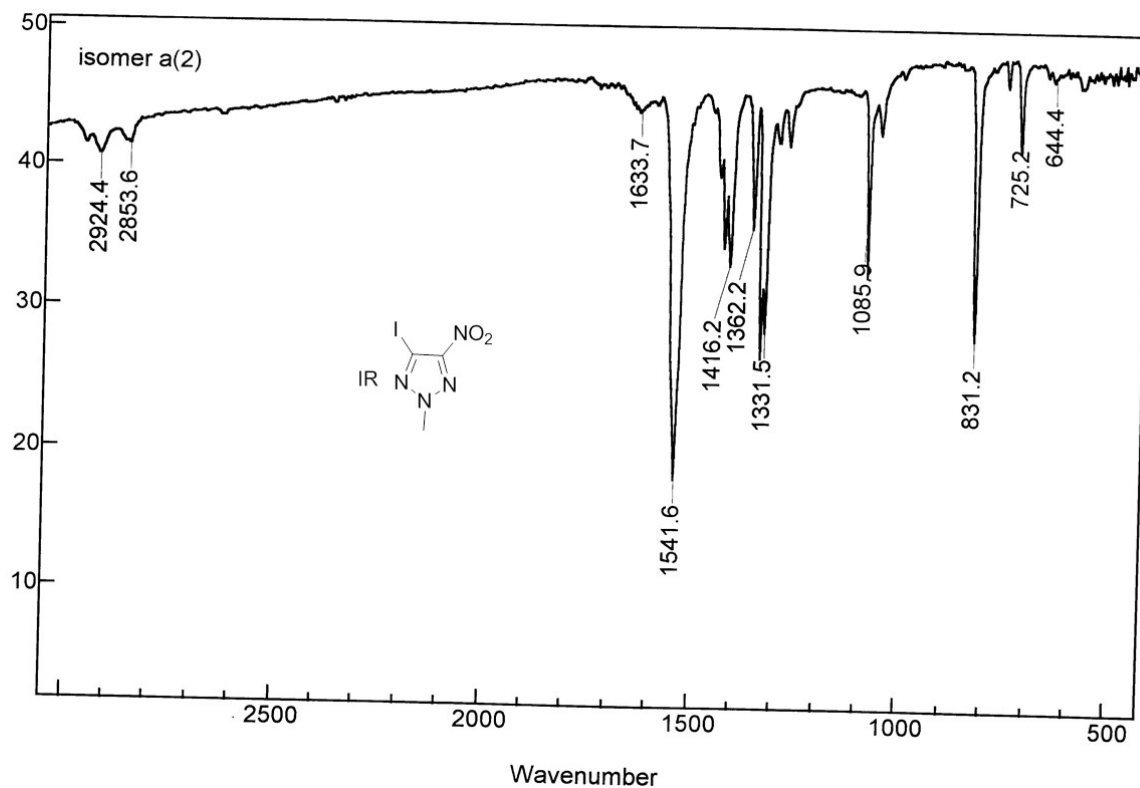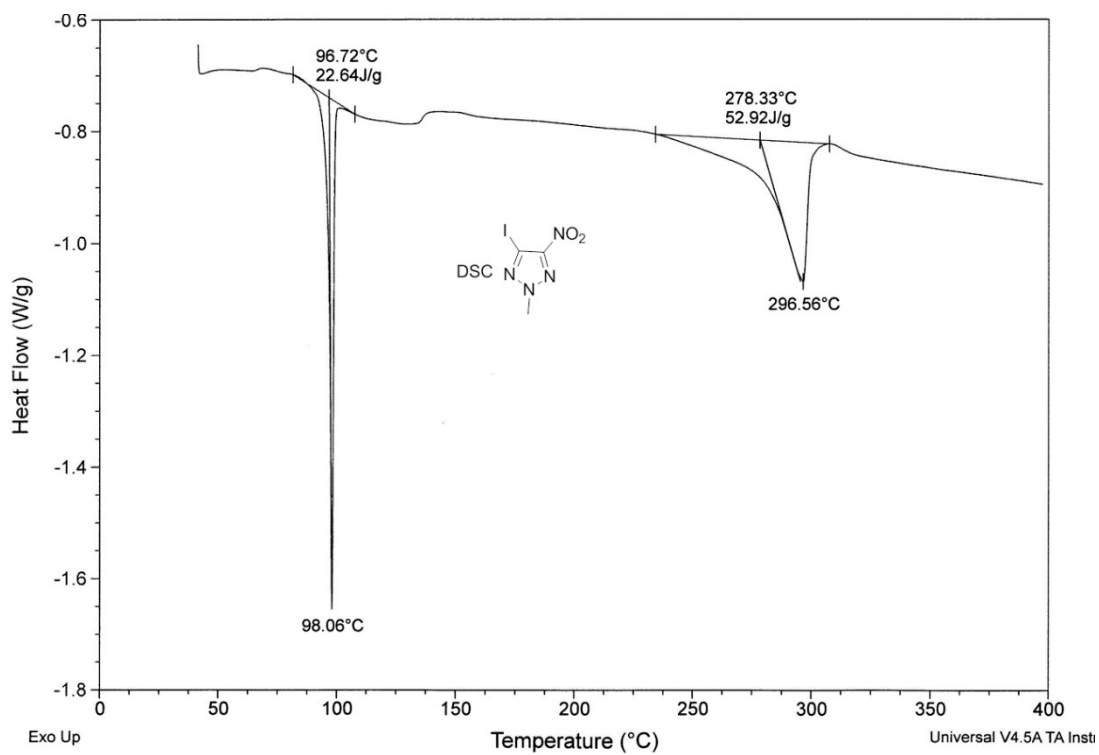

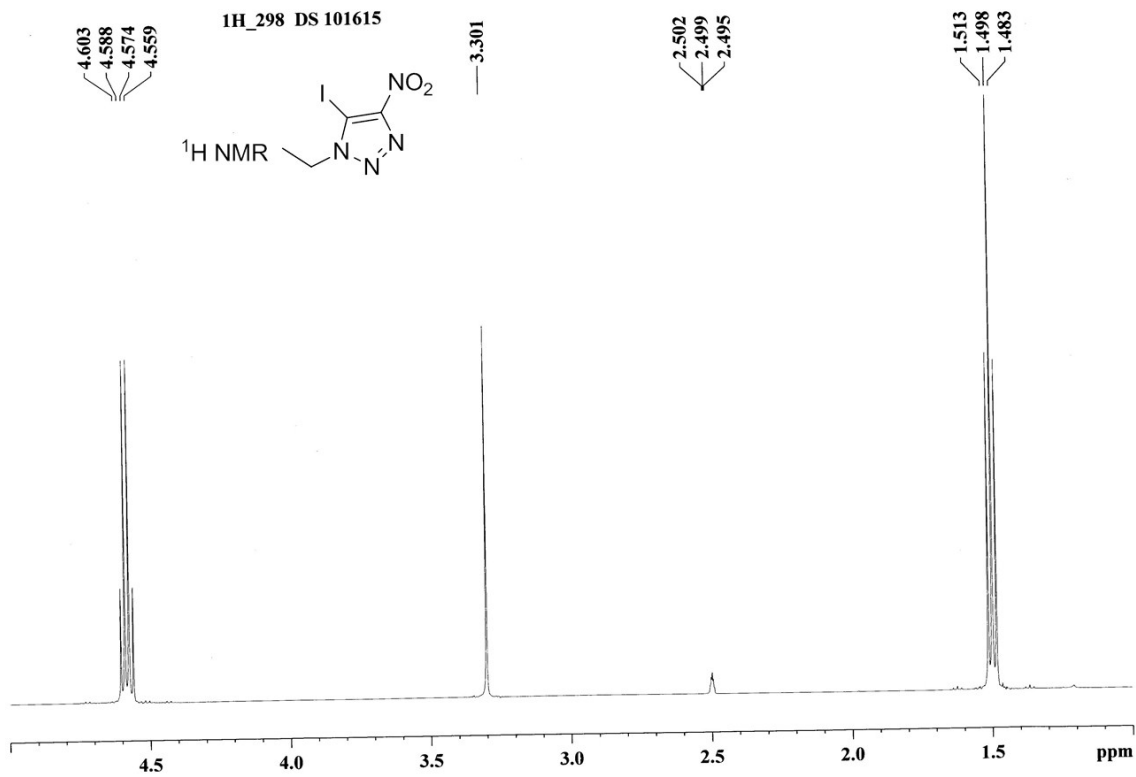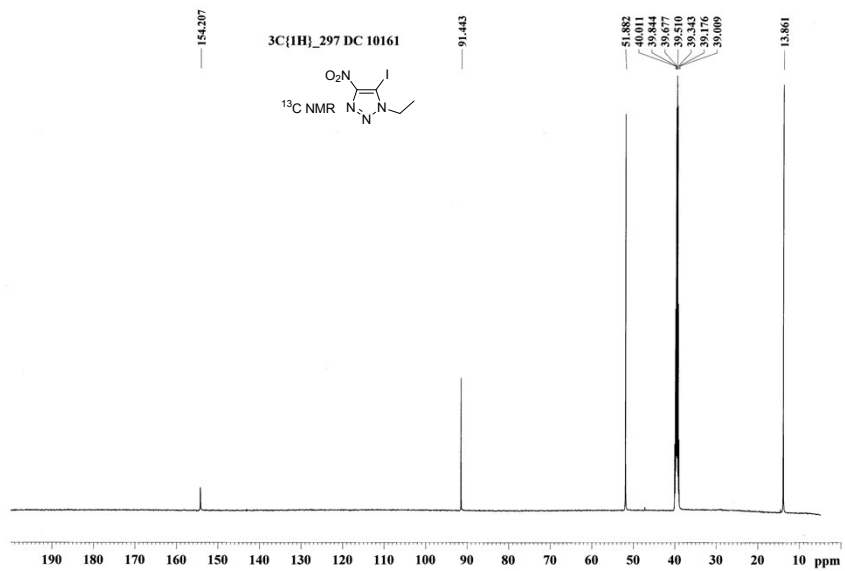

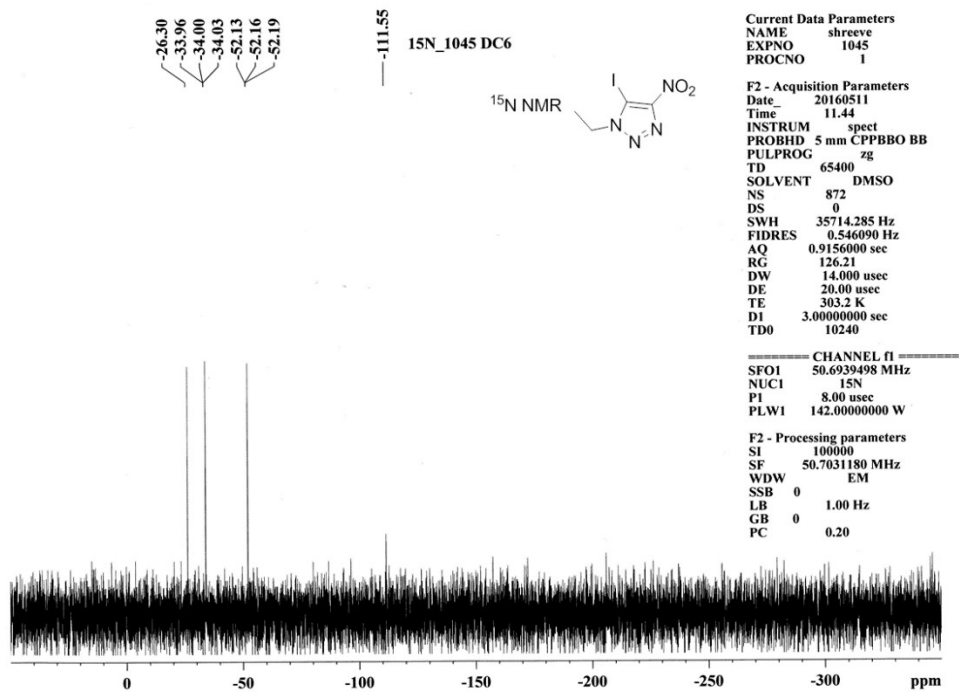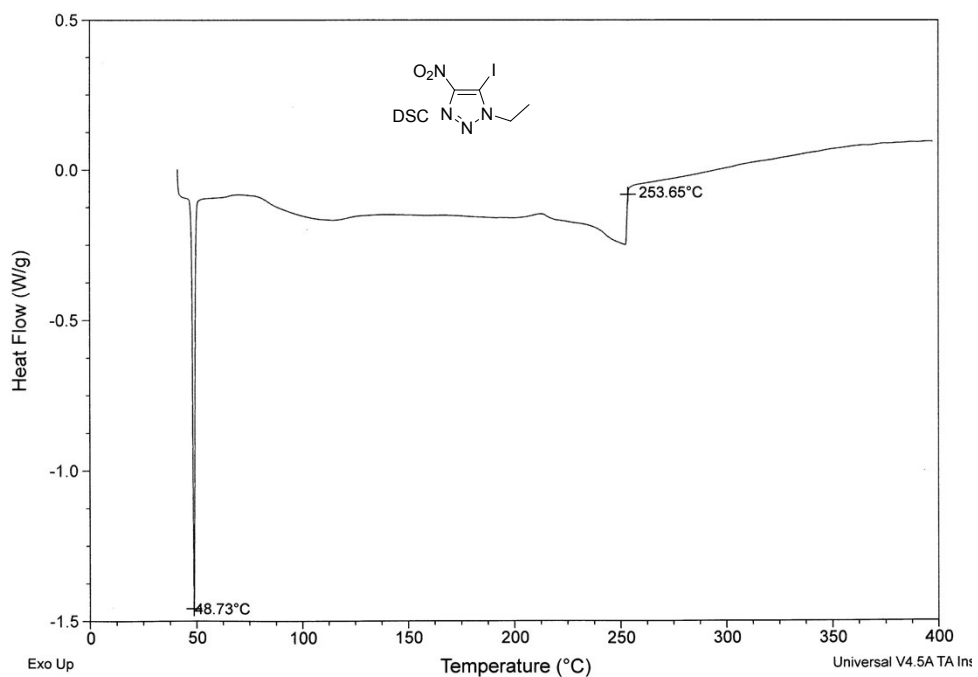

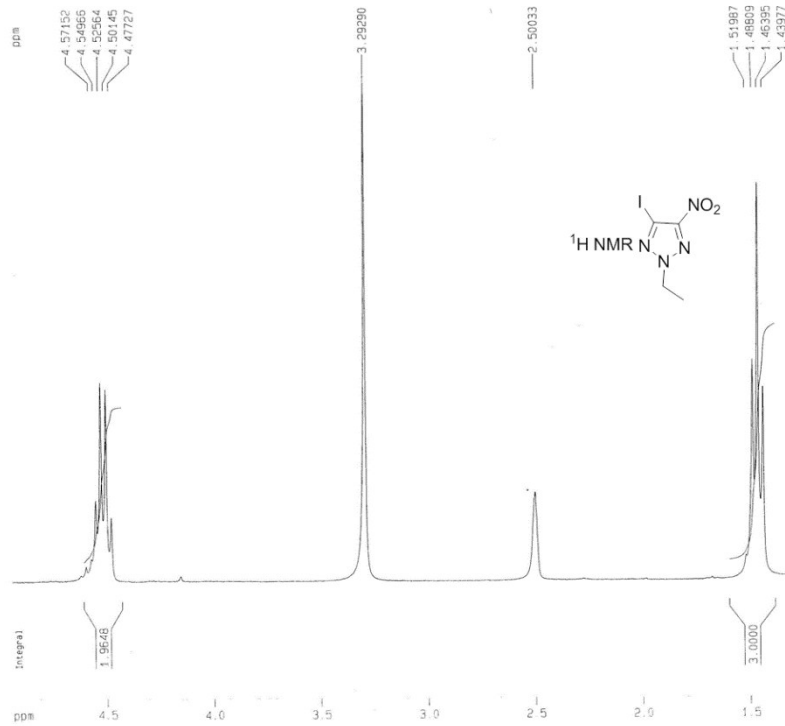

Current Data Parameters  
 NAME dpknp1H  
 EXPNO 1805  
 PROCNO 1

F2 - Acquisition Parameters  
 Date\_ 20151015  
 Time 21.51  
 INSTRUM spect  
 PROBHD 5 mm QNP 1H/13  
 PULPROG zg  
 TD 32768  
 SOLVENT Acetone  
 NS 8  
 DS 0  
 SWH 6613.757 Hz  
 FIDRES 0.201836 Hz  
 AQ 2.4773109 sec  
 RG 574.7  
 DW 75.600 usec  
 DE 6.00 usec  
 TE 300.0 K  
 D1 1.0000000 sec

===== CHANNEL f1 =====  
 NUC1 1H  
 P1 3.00 usec  
 PL1 -4.00 dB  
 SF01 300.1327000 MHz

F2 - Processing parameters  
 SI 32768  
 SF 300.1300024 MHz  
 WDW EM  
 SSB 0  
 LB 0.30 Hz  
 GB 0  
 PC 1.00

1D NMR plot parameters  
 CX 20.00 cm  
 CY 12.50 cm  
 F1P 4.942 ppm  
 F1 1483.30 Hz  
 F2P 1.291 ppm  
 F2 387.46 Hz  
 GPCMC 0.16256 ppm/cm  
 GZCM 54.79194 Hz/cm

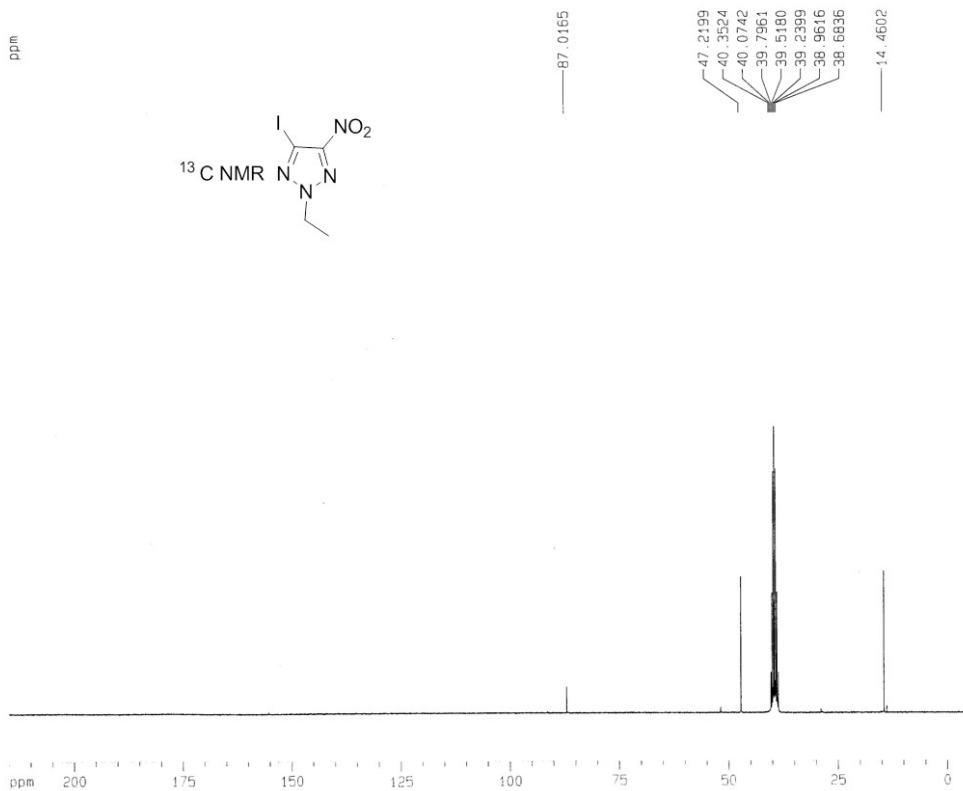

Current Data Parameters  
 NAME dpknp13C  
 EXPNO 1708  
 PROCNO 1

F2 - Acquisition Parameters  
 Date\_ 20151019  
 Time 22.47  
 INSTRUM spect  
 PROBHD 5 mm QNP 1H/13  
 PULPROG zgpg  
 TD 32768  
 SOLVENT CDCl3  
 NS 24253  
 DS 0  
 SWH 17985.611 Hz  
 FIDRES 0.548877 Hz  
 AQ 0.9110004 sec  
 RG 18390.4  
 DW 27.800 usec  
 DE 6.00 usec  
 TE 300.0 K  
 D1 1.0000000 sec  
 d11 0.0300000 sec  
 d12 0.0002000 sec

===== CHANNEL f1 =====  
 NUC1 13C  
 P1 4.00 usec  
 PL1 -5.00 dB  
 SF01 75.4752953 MHz

===== CHANNEL f2 =====  
 CPDPRG2 waltz16  
 NUC2 1H  
 PCPD2 100.00 usec  
 PL2 120.00 dB  
 PL12 17.00 dB  
 PL13 17.00 dB  
 SF02 300.1312005 MHz

F2 - Processing parameters  
 SI 32768  
 SF 75.4677892 MHz  
 WDW EM  
 SSB 0  
 LB 0.50 Hz  
 GB 0  
 PC 1.40

1D NMR plot parameters  
 CX 20.00 cm  
 CY 6.00 cm  
 F1P 215.000 ppm  
 F1 16225.58 Hz  
 F2P -5.000 ppm  
 F2 -377.34 Hz  
 GPCMC 11.09000 ppm/cm  
 GZCM 830.14563 Hz/cm



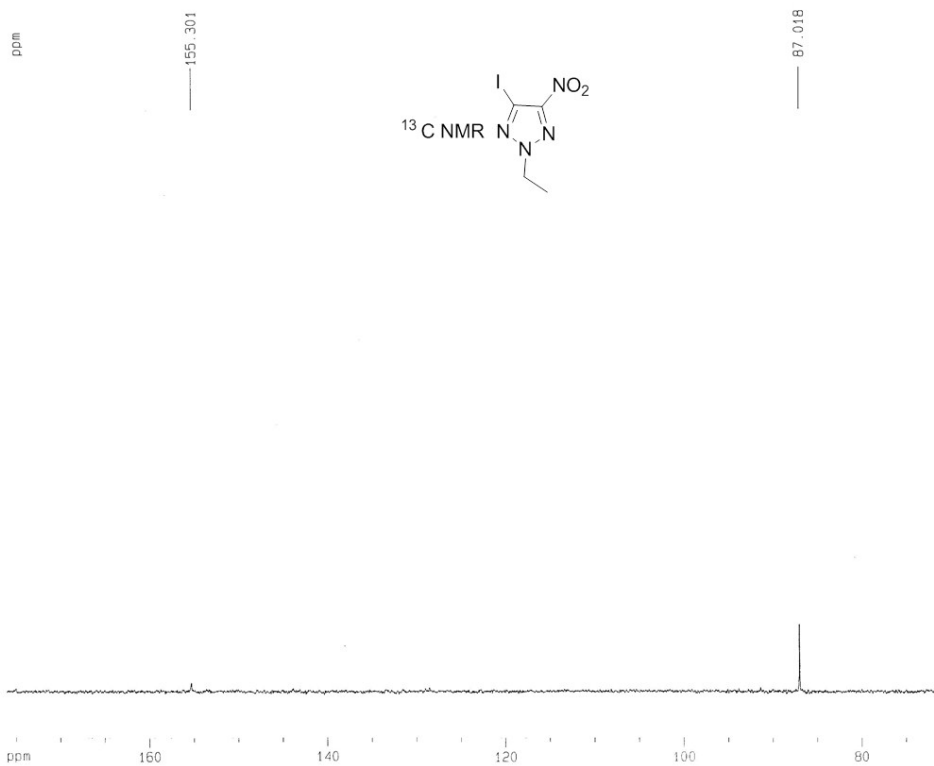

Current Data Parameters  
 NAME dpknp13C  
 EXPNO 1708  
 PROCNO 1

F2 - Acquisition Parameters  
 Date\_ 20151019  
 Time 22.47  
 INSTRUM spect  
 PROBHD 5 mm QNP 1H/13  
 PULPROG zgpg30  
 ID 32768  
 SOLVENT CDCl3  
 NS 24253  
 DS 0  
 SWH 17985.611 Hz  
 FIDRES 0.548877 Hz  
 AQ 0.9110004 sec  
 RG 18390.4  
 OW 27.800 usec  
 OE 6.00 usec  
 TE 300.0 K  
 D1 1.00000000 sec  
 d11 0.03000000 sec  
 d12 0.00000000 sec

\*\*\*\*\* CHANNEL f1 \*\*\*\*\*  
 NUC1 13C  
 P1 4.00 usec  
 PL1 -5.00 dB  
 SFO1 75.4752953 MHz

\*\*\*\*\* CHANNEL f2 \*\*\*\*\*  
 CPDPRG2 waltz16  
 NUC2 1H  
 PCPD2 100.00 usec  
 PL2 120.00 dB  
 PL12 17.00 dB  
 PL13 17.00 dB  
 SFO2 300.1312005 MHz

F2 - Processing parameters  
 SI 32768  
 SF 75.4677892 MHz  
 WDW EM  
 SSB 0  
 LB 3.00 Hz  
 GB 0  
 PC 1.40

ID NMR plot parameters  
 CX 20.00 cm  
 CY 25.00 cm  
 FAP 176.097 ppm  
 F1 13289.69 Hz  
 F2 11.162 ppm  
 F2 5370.48 Hz  
 PRMCM 5.24675 ppm/cm  
 HZCM 395.96051 Hz/cm

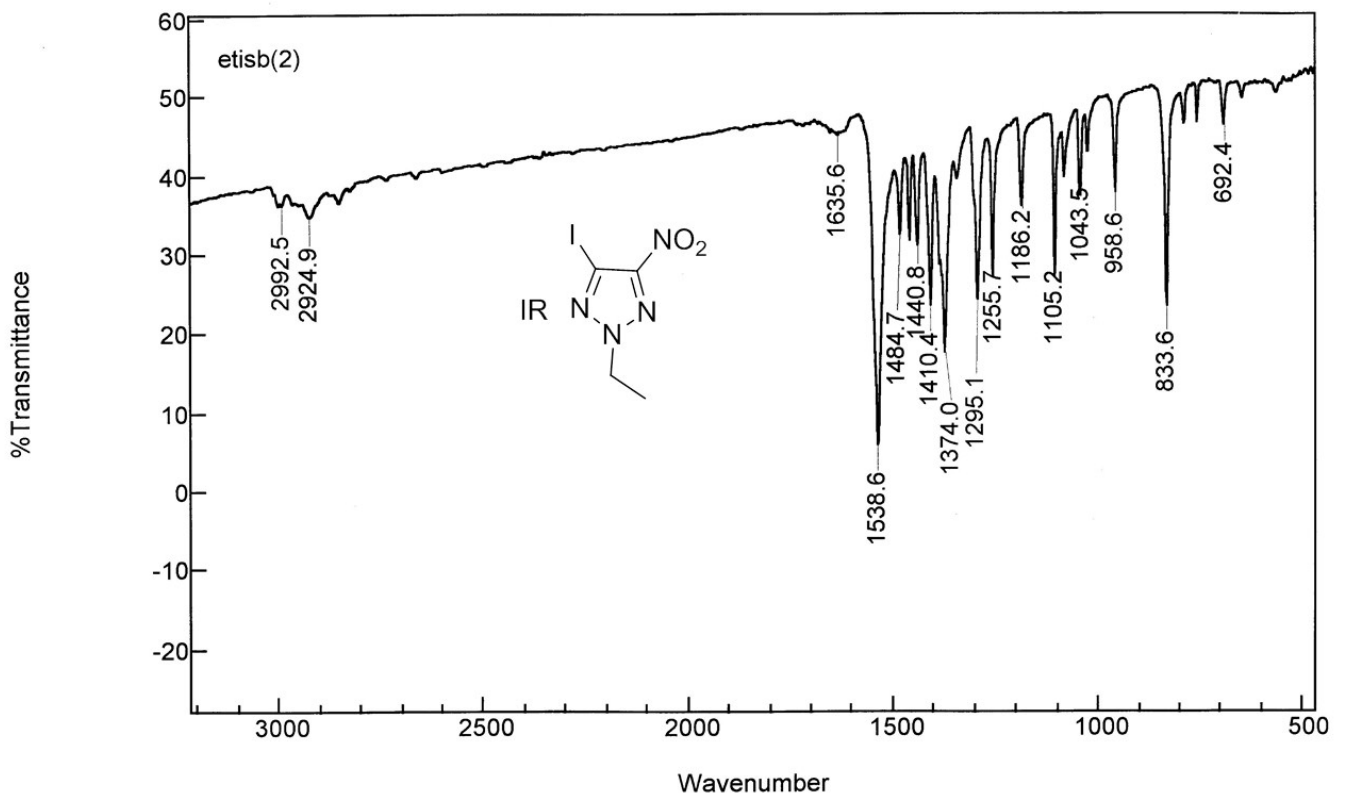

Supplement: c6dt01731b1.pdf [file c6dt01731b1.pdf]
